# Supplementary material for: Impaired B cell immunity in acute myeloid leukemia patients after chemotherapy
Source: J Transl Med. 2017 Jul 10;15:155. doi: 10.1186/s12967-017-1252-2 (PMC5504716; doi:10.1186/s12967-017-1252-2)
Supplement: Supplementary file 2 — Additional file 2. Supplemental tables. [file 12967_2017_1252_MOESM2_ESM.xlsx]

## Sheet: Table S1 (Flow Panel)
Table S1
Excitation	Fluorochrome	PMT	T lineage	B lineage	DC/Mono
407 excitation	V450 Pac blue	V450	CD4 RPA-T4	CD80 L307.4	CD123 6H6
	Aquablue	V545	Viability	Viability	Viability
	Qdot 605	V605	CD8 3B5	CD27 CLB-27/1	CD4 S3.5
	Qdot 655	V655	CD27 CLB-27/1	CD19 SJ25-C1	CD14 TuK4
	Qdot 800	V800	CD45 HI90	CD45 HI90	CD45 HI90
488 excitation	FITC	B515	CD39 A1	IgA Polyclonal goat	IFNa MMHA-11
	PcPcy5.5	B710	CD38 HIT2	CD86 IT2.2	TNFa MAb11
532 excitation	PE	G560	Foxp3 PCH101	CD21 BL13	CD40 HB14
	PE-TR	G610	CD45-RA 2H4LDH11LDB9	CD38 HIT2	HLA-DR Tu36
	PEcy5	G660	CD103 LF61	IgG G18-145	CD83 HB15e
	Pecy5.5/PE-A700	G710	HLA-DR Tu36	CD20 HI47	CD11c Bu15
	PEcy7	G780	CD25 M-A251	CD23 EBVCS-5	Lineage mix see below
633 excitation	APC	R660	CD127 hIL-7R-M21	IgD IgD26	BDCA-2 AC144
	Alexa700/APCcy5.5	R710	CD197 150503	IgM CH2	CD33 WM-53
	APCcy7	R780	CD3 Sk7	CD10 HI10a	CD86 IT2.2
*lineage mix = CD3 (SK7), CD56 (NCAM16.2), CD20 (L27), CD19 (SJ25C1), CD16 (3G8)

## Sheet: Table S2  (CBC)
Table S2
Count	Range Units	Pt 1 Pre	Pt 1 Post	Pt 2 Pre	Pt 2 Post	Pt 3 Pre	Pt 3 Post	Pt 4 Pre	Pt 4 Post	Pt 5 Pre	Pt 5 Post	Pt 6 Pre	Pt 6 Post	Pt 7 Pre	Pt 7 Post	Pt 8 Pre	Pt 8 Post	Pt 9 Pre	Pt 9 Post	Pt 10 Pre	Pt 10 Post	Low Range	High Range
		2012-10-23	2012-11-13	2012-10-23	2012-11-20	2012-10-23	2012-12-13	2012-11-02	2012-11-30	2012-11-26	2012-12-20	2012-11-30	2013-01-04	2012-12-29		2012-12-14	2013-01-18	2013-02-07	2013-03-04	2013-01-31	2013-02-28
WBC	/cu mm	7950	7430	3480	3270	4950	4860	4930	2900	5010	3890	4030	4440	4460		6490	6940	3970	4690	5290	5860	4500	11000
RBC	M/cu mm	4.01	4.06	2.89	2.7	3.88	3.82	3.75	3.65	3.8	3.42	4.31	4.01	4.01		3.56	4.15	3.37	3.88	4.8	5.19	4/4.5	5.2/5.9
hemoglobin	g/dL	12.9	12.8	8.8	8.7	14	13.2	13	12.4	11.9	10.9	14.7	13.8	13.2		12	14.2	12.5	14.4	12.6	13.6	12/13.9	15/16.3
hematocrit	%	38.7	39.2	25.8	25.5	39.8	39	37.5	36.5	34.9	31.4	41.7	38.6	37		35.4	41.6	37.6	41.8	38.7	42.6	36/41	46/53
mean corpuscular vol	fL	96.5	96.6	89.3	94.4	102.6	102.1	100	100	91.8	91.8	96.8	96.3	92.3		99.4	100.2	111.6	107.7	80.6	82.1	80	100
mean corpuscular HGB	pg	32.2	31.5	30.4	32.2	36.1	34.6	34.7	34	31.3	31.9	34.1	34.4	32.9		33.7	34.2	37.1	37.1	26.3	26.2	26	34
mean corpus HGB conc	g/dL	33.3	32.7	34.1	34.1	35.2	33.8	34.7	34	34.1	34.7	35.3	35.8	35.7		33.9	34.1	33.2	34.4	32.6	31.9	31	37
RBC distrib width	%	13.3	14.8	15.9	21	13.2	13.5	13.2	12.8	12.7	12.9	13.7	13.4	13.3		18.4	14.3	12.8	13.5	20.7	19	11.5	14.5
platelet count	K/cu mm	339	156	121	215	74	85	140	101	182	167	181	216	210		125	104	42	40	233	228	150	350
mean platelet volume	fL	9.5	9.9	9.6	9.5	10	10.4	9.2	9.7	10.1	9.4	9.7	9.8	9.3		11.4	11.6	10.2	10.8	11.3	11.6	9.2	12.7
lymph %	%	20.9	15.6	21.6	19	51.1	53.7	16.4	27.9	37.1	39.8	67.2	57.7	26		10	13	18.4	12.2	27.2	33.1	24	44
monocyte %	%	13.1	14.5	7.8	10.4	8.7	9.3	8.5	8.3	8	9.5	8.9	9	9		16.9	8.1	8.1	5.1	17.2	8.4	2	11
neutrophil %	%	63.4	67.3	65.4	66.6	38.2	34.8	72.7	61	44.1	44.5	20	29.2	60.5		69.2	77.3	71.7	82.3	52.2	55.4	40	70
immagure gran %	%	0.6	0	0	0	0	0	0	0	0	0	0	0	0		0.5	0	0	0	0.4	0.9	0	1
eosinophil %	%	1.5	2.3	4.6	3.7	1.8	1.6	2.2	2.8	10.4	5.4	3.7	3.6	4.3		3.1	1.6	1.5	0.2	2.6	1.9	1	4
basophil %	%	0.5	0.3	0.6	0.3	0.2	0.6	0.2	0	0.4	0.8	0.2	0.5	0.2		0.3	0	0.3	0.2	0.4	0.3	0	2
lymph number	/cu mm	1660	1160	750	620	2530	2610	810	810	1860	1550	2710	2560	1160		650	900	730	570	1440	1940	1100	4800
monocyte number	/cu mm	1040	1080	270	340	430	450	420	240	400	370	360	400	400		1100	560	320	240	910	490	100	1200
neutrophil num (anc)	/cu mm	5040	5000	2280	2180	1890	1690	3580	1770	2210	1730	800	1300	2700		4490	5370	2850	3860	2760	3250	1500	7800
immature gran number	/cu mm	50	0	0	0	0	0	0	0	0	0	0	0	0		30	0	0	0	20	50	0	50
eosinophil number	/cu mm	120	170	160	120	90	80	110	80	520	210	150	160	190		200	110	60	100	140	110	120	300
NRBC number	/cu mm	0	0	0	0	0	0	0	0	0	0	0	0	0		0	0	0	0	0	0	0	12
J1293 blood draw date		2012-10-23	2012-11-21	2012-10-23	2012-11-20	2012-11-01	2012-11-29	2012-11-02	2012-11-30	2012-11-26	2012-12-20	2012-11-30	2012-12-28	2012-12-29		2014-12-21	2013-01-18	2013-02-07	2013-03-04	2013-01-31	2013-02-28
below range
above range
female

## Sheet: Table S3 (Cell Populations)
Table S3
Code	Subset Name
ID1	T cells
ID2	T helper
ID3	Double Positive
ID4	T cytotoxic
ID5	T immature
ID8	Activated T helper cells CD25+
ID9	Activated T helper cells CD38+
ID10	Activated T helper cells HLA-DR+
ID121	Naïve T helper cells
ID122	T helper EMRA
ID123	Effector T helper
ID124	Total Memory T helper
ID125	Naïve T cytotoxic cells
ID126	T cytotoxic EMRA
ID127	Effector T cytotoxic
ID128	Total Memory T cytotoxic
ID30	Activated T helper cells CD39+ (Treg)
ID31	Integrin aE T helper cells (Treg)
ID32	IL7 r on T helper cells (activated and Treg)
ID33	T helper CD27+
ID34	T helper CD4+ RA+
ID35	T helper CD4+ RA-
ID40	Activated T cytotoxic CD25+
ID41	Activated T cytotoxic CD38+
ID42	Activated T cytotoxic HLA-DR+
ID43	Activated T cytotoxic CD39+
ID44	Activated T cytotoxic CD103+
ID45	Activated T cytotoxic CD 127+
ID52	T cytotoxic CD8+ CD27+
ID53	T cytotoxic CD8+ RA+
ID56	T cytotoxic CD8+ RA-
ID59	Treg
ID60	Treg CD38+
ID61	Treg CD39+
ID62	Treg CD103+
ID63	Treg HLA-DR+
ID129	Naïve T-reg RA+
ID130	Memory T-reg RA-
ID64	Monocytes
ID66	Activated Monocyte CD83+
ID67	Activated Monocytes CD86+
ID70	Dendritic cells
ID73	Myeloid Dendritic cells (mDC)
ID74	TNFa secreting mDCs
ID75	IFNa secreting mDCs
ID76	Plasmacytoid dendritic cells (pDC)
ID77	TNFa secreting pDCs
ID78	IFNa secreting pDCs
ID131	BDCA2+ pDC
ID80	Total B cells (CD19+CD20+)
ID81	Mature Activated B CD80+
ID82	Mature Activated B CD86+
ID83	Mature B IgA+
ID84	Mature B IgG+
ID85	Mature B IgM+ IgD+
ID86	Mature B IgM- IgD-
ID87	Plasmablast
ID88	Activated Plasmablast CD23+
ID89	Activated Plasmablast CD21+
ID90	Transitional B cells
ID91	Transitional B cells CD38+
ID92	Transitional B cell activated CD23+
ID93	Transitional B cell activated CD21+
ID94	Memory B cells
ID95	Memory B cells IgD-CD23+
ID96	Memory B cells IgD-CD38+
ID97	Memory B cells IgD-CD80+
ID98	Memory B cells IgD-CD86+
ID99	Memory B cells IgD- IgA+
ID100	Memory B cells IgD- IgG+
ID101	Memory B cells IgD+
ID102	Memory B cells IgD+ CD23+
ID103	Memory B cells IgD+ CD38+
ID104	Memory B cells IgD+ CD80+
ID105	Memory B cells IgD+ CD86+
ID106	Naïve B cells
ID107	Naïve B cells activated CD21+
ID108	Naïve B cells activated CD38+
ID109	Naïve B cells activated CD80+
ID110	Naïve B cells activated CD86+
ID111	Naïve B cells IgA+
ID112	Naïve B cells IgG+
ID113	Memory CD27- B cells
ID114	Memory CD27- B cells CD21+
ID115	Memory CD27- B cells CD38+
ID116	Memory CD27- B cells CD80+
ID117	Memory CD27- B cells CD86+
ID118	Memory CD27- B cells CD23+
ID119	Memory CD27- B cells IgA+
ID120	Memory CD27- B cells IgG+
ID132	Resting Memory B-cells
ID133	Altered Memory B-cells
ID134	Activated Memory B-cells

## Sheet: Table S4 (Summary Differences)
Table S4
Code	Subset Name	Means significantly different? (10 AML vs 10 HD)	Means significantly different? (8 AML-NR vs 10 HD)	Variances significantly different? (10 AML vs 10 HD)	Variances significantly different? (8 AML-NR vs 10 HD)
ID8	Activated T helper cells CD25+	YES
ID9	Activated T helper cells CD38+		YES
ID121	Naïve T helper cells	YES
ID32	IL7 r on T helper cells (activated and Treg)	YES	YES
ID34	T helper CD4+ RA+			YES	YES
ID35	T helper CD4+ RA-			YES	YES
ID41	Activated T cytotoxic CD38+	YES		YES	YES
ID43	Activated T cytotoxic CD39+			YES	YES
ID44	Activated T cytotoxic CD103+			YES
ID60	Treg CD38+	YES
ID129	Naïve T-reg RA+	YES	YES
ID130	Memory T-reg RA-	YES	YES
ID66	Activated Monocyte CD83+			YES	YES
ID73	Myeloid Dendritic cells (mDC)	YES	YES
ID74	TNFa secreting mDCs			YES	YES
ID76	Plasmacytoid dendritic cells (pDC)	YES	YES
ID77	TNFa secreting pDCs			YES	YES
ID78	IFNa secreting pDCs			YES	YES
ID131	BDCA2+ pDC	YES
ID82	Mature Activated B CD86+	YES	YES
ID83	Mature B IgA+	YES	YES
ID84	Mature B IgG+	YES	YES
ID85	Mature B IgM+ IgD+	YES
ID86	Mature B IgM- IgD-	YES	YES		YES
ID90	Transitional B cells	YES	YES	YES	YES
ID93	Transitional B cell activated CD21+				YES
ID94	Memory B cells IgD-	YES	YES
ID98	Memory B cells IgD-CD86+	YES	YES	YES	YES
ID103	Memory B cells IgD+ CD38+			YES	YES
ID101	Memory B cells IgD+	YES	YES
ID108	Naïve B cells activated CD38+			YES	YES
ID110	Naïve B cells activated CD86+	YES	YES
ID113	Memory CD27- B cells		YES
ID132	Resting Memory B-cells	YES		YES	YES

## Sheet: Table S5 (Gene Sets AML-NR)
Table S5
ID	Name	p-value	q-value Bonferroni	q-value FDR B&H	q-value FDR B&Y	Hit Count in Query List	Hit Count in Genome	Hit in Query List
GO:1901700	response to oxygen-containing compound	2.547e-13	1.745e-09	8.923e-10	8.396e-09	133	1615	EPS8	ERCC1	AOC1	ABR	LILRB2	TCIRG1	ADA	RXRA	RAB8A	ADM	GRK2	CCL3	FOXO4	ALAD	MMP19	STK25	CARM1	ADCY4	ZC3H12A	KAT5	FOS	FOSL2	APOA2	SIPA1	SBNO2	SIRT2	ARSA	MTHFR	PYCARD	SMARCA4	IRS2	G6PD	WDTC1	MYD88	ATP6V0B	ATP6AP1	SPI1	GAS6	SREBF1	SRF	RUVBL2	LILRB1
GO:0012501	programmed cell death	2.604e-13	1.785e-09	8.923e-10	8.396e-09	153	1963	ERBB4	ERCC2	ABR	RPS6KA1	ACP2	ACTN4	ADA	ADAM8	RXRA	MEF2D	AXIN1	ADM	MITF	MAP3K11	CCL3	DDX41	STK25	TRAF7	FLNA	ZC3H12A	CARD19	ZNF622	MTFP1	CBX4	ARAF	RBCK1	ARHGAP4	PIGT	SIRT2	ARRB2	PYCARD	MARK4	SMARCA4	ATF3	IRS2	SNAI1	MUC1	G6PD	NAIF1	MYD88	GADD45B	PLK2
GO:0006915	apoptotic process	2.94e-12	2.015e-08	5.858e-09	5.512e-08	148	1934	ERBB4	ERCC2	ABR	RPS6KA1	ACTN4	ADA	ADAM8	RXRA	MEF2D	AXIN1	ADM	MITF	MAP3K11	CCL3	DDX41	STK25	TRAF7	FLNA	ZC3H12A	CARD19	ZNF622	MTFP1	CBX4	ARAF	RBCK1	ARHGAP4	PIGT	SIRT2	ARRB2	PYCARD	SMARCA4	ATF3	IRS2	SNAI1	MUC1	G6PD	NAIF1	MYD88	GADD45B	PLK2	PRELID1	SPI1
GO:0001775	cell activation	3.42e-12	2.343e-08	5.858e-09	5.512e-08	93	1007	ERCC1	ABR	LILRB2	RPS6KA1	PI4K2A	ACVRL1	ADA	ADAM8	PRAM1	MAD1L1	FES	CCL3	FGR	PREX1	STOML2	TPST2	FLNA	ZC3H12A	GIT1	SBNO2	ARRB2	TNFSF13B	PYCARD	MYO1F	IRS2	STX11	DGAT1	MYD88	MYH9	PRELID1	SPI1	GAS6	SRF	UNC13D	BCL3	LILRB1	VSIR	STK11	STXBP2	ZFP36L2	JMJD6	SEMA4A
GO:0016192	vesicle-mediated transport	7.174e-12	4.916e-08	9.832e-09	9.251e-08	123	1518	RIN3	ABR	2017-03-02	TBC1D2	PI4K2A	ACTN4	FAM160A2	DYSF	RAB8A	ADM	PRAM1	GRK2	AP2A1	AP1B1	OSBPL5	FES	CCL3	FGR	CLEC10A	ALDOA	FLNA	CCDC22	ANXA11	PPP6R1	RAB20	RNF126	ARF5	MSR1	UBE2O	ARRB2	YKT6	RANGRF	ASGR2	PYCARD	MYO1F	STX11	STX10	MYO1G	VPS11	MYH9	GAK	TBC1D9B
GO:1902531	regulation of intracellular signal transduction	1.934e-11	1.325e-07	2.209e-08	2.079e-07	137	1786	PIK3AP1	ERBB4	SPRED2	ABR	ACTN4	GMIP	RRAS	ADA	ADAM8	MAP3K3	AXIN1	S100A4	MAP3K11	CCL3	CCL11	FGR	SIPA1L2	FEM1A	PREX1	ARAP1	STK25	SECTM1	TRAF7	FLNA	ZC3H12A	CCDC22	KAT5	CARD19	ZNF622	LRRC4C	SIPA1	ARAF	RBCK1	RHOC	ARHGAP1	ARHGAP4	ARRB2	PYCARD	ATF3	IRS2	SNAI1	DOT1L
GO:0043067	regulation of programmed cell death	1.168e-10	8.002e-07	1.143e-07	1.076e-06	121	1549	ERBB4	ABR	RPS6KA1	ACTN4	ADA	ADAM8	RXRA	ADM	MITF	MAP3K11	CCL3	TRAF7	FLNA	ZC3H12A	CARD19	ZNF622	CBX4	ARAF	RBCK1	ARHGAP4	SIRT2	ARRB2	PYCARD	MARK4	SMARCA4	ATF3	IRS2	SNAI1	MUC1	G6PD	MYD88	GADD45B	PLK2	PRELID1	BAG1	GAS6	SIK1	BCL3	LILRB1	BID	BMP3	IER3
GO:0042981	regulation of apoptotic process	2.425e-10	1.661e-06	2.077e-07	1.954e-06	119	1532	ERBB4	ABR	RPS6KA1	ACTN4	ADA	ADAM8	RXRA	ADM	MITF	MAP3K11	CCL3	TRAF7	FLNA	ZC3H12A	CARD19	ZNF622	CBX4	ARAF	RBCK1	ARHGAP4	SIRT2	ARRB2	PYCARD	SMARCA4	ATF3	IRS2	SNAI1	MUC1	G6PD	MYD88	GADD45B	PLK2	PRELID1	BAG1	GAS6	SIK1	BCL3	LILRB1	BID	BMP3	IER3	NFKBIA
GO:0045321	leukocyte activation	2.799e-10	1.918e-06	2.131e-07	2.005e-06	77	833	ERCC1	ABR	LILRB2	PI4K2A	ADA	ADAM8	PRAM1	MAD1L1	FES	CCL3	FGR	PREX1	STOML2	ZC3H12A	GIT1	SBNO2	TNFSF13B	PYCARD	MYO1F	IRS2	STX11	MYD88	MYH9	PRELID1	SPI1	GAS6	SRF	UNC13D	BCL3	LILRB1	VSIR	STK11	STXBP2	ZFP36L2	JMJD6	SEMA4A	AP3D1	ICOSLG	ADRM1	NCSTN	TGFB1	THBS1
GO:0044093	positive regulation of molecular function	6.728e-10	4.61e-06	4.302e-07	4.048e-06	138	1899	ERBB4	RIN3	ERCC2	ABR	RGS19	TBC1D2	ACTN4	GMIP	ADAM8	MAP3K3	AXIN1	MAP3K11	CCL3	CCL11	FGR	SIPA1L2	PREX1	ARAP1	TRAF7	ADCY4	GIT1	ZNF622	APOA2	CAMK1	SIPA1	ARAF	RBCK1	RHOC	ARHGAP1	ARHGAP4	SIRT2	RANGRF	PYCARD	SMARCA4	IRS2	MYD88	GADD45B	PLK2	TBC1D9B	PRELID1	MYO9B	GAS6
GO:0009967	positive regulation of signal transduction	6.906e-10	4.732e-06	4.302e-07	4.048e-06	115	1488	PIK3AP1	EPS8	ERBB4	SPRED2	ACTN4	ACVRL1	ADA	ADAM8	MAP3K3	AXIN1	S100A4	MAP3K11	CCL3	CCL11	FGR	ARAP1	STK25	SECTM1	TRAF7	FLNA	ZC3H12A	CCDC22	SH3BP2	ZNF622	ARAF	RBCK1	RHOC	ARHGAP1	ARHGAP4	UBE2O	ARRB2	PYCARD	SMARCA4	ATF3	MYD88	GADD45B	PLK2	ATP6AP1	GAS6	ZC3H3	VSIR	BID
GO:0010941	regulation of cell death	1.245e-09	8.53e-06	6.719e-07	6.323e-06	124	1663	ERBB4	ABR	RPS6KA1	ACTN4	ADA	ADAM8	RXRA	ADM	MITF	MAP3K11	CCL3	TRAF7	FLNA	ZC3H12A	CARD19	ZNF622	CBX4	ARAF	RBCK1	ARHGAP4	SIRT2	ARRB2	PYCARD	MARK4	SMARCA4	ATF3	IRS2	SNAI1	MUC1	G6PD	MYD88	GADD45B	PLK2	PRELID1	BAG1	GAS6	SIK1	BCL3	LILRB1	BID	BMP3	IER3
GO:0002275	myeloid cell activation involved in immune response	1.275e-09	8.735e-06	6.719e-07	6.323e-06	19	81	ABR	PI4K2A	PRAM1	FES	CCL3	FGR	SBNO2	PYCARD	MYO1F	STX11	UNC13D	STXBP2	HMOX1	TYROBP	PLD2	LAT2	GAB2	NR4A3	LGALS9
GO:0051247	positive regulation of protein metabolic process	1.426e-09	9.771e-06	6.98e-07	6.567e-06	121	1613	ERBB4	JDP2	ACVRL1	ADAM8	RXRA	MAP3K3	AXIN1	MAP3K11	CCL3	CCL11	MAD2L2	STK25	TRAF7	ADCY4	ZC3H12A	CCDC22	KAT5	ZNF622	APOA2	CAMK1	ARAF	SIRT2	ARRB2	PYCARD	SUMO3	MUC1	MYD88	GADD45B	ZFAND2A	VPS11	PLK2	MYH9	ATP6AP1	PRELID1	GAS6	SREBF1	BCL3	RUVBL2	ARID5A	GFRA2	BID	STK11
GO:0002237	response to molecule of bacterial origin	1.599e-09	1.096e-05	7.306e-07	6.875e-06	43	358	ABR	LILRB2	ADM	CCL3	ALAD	ZC3H12A	FOS	SBNO2	SIRT2	PYCARD	MYD88	LILRB1	NFKBIA	NFKBIB	C5AR1	NOTCH1	SASH1	SOCS3	CXCL2	TGFB1	MTA1	CD14	TNFAIP3	RELT	HCK	PDE4B	CEBPB	NOCT	HSF1	CNP	COMT	ICAM1	MAPK3	IL10RA	IRF5	PTGIR	JUNB	JUND	MAPKAPK3	PLSCR3	RARA	LGALS9
GO:0048534	hematopoietic or lymphoid organ development	2.323e-09	1.591e-05	9.41e-07	8.854e-06	79	905	ERCC1	ERCC2	LILRB2	RRAS	ADA	ADAM8	HIST1H4D	MAD1L1	MITF	FES	CCL3	PREX1	FOS	SBNO2	KLF13	SMARCA4	G6PD	MYH9	ATP6AP1	PRELID1	SPI1	MYO1E	GAS6	SRF	BCL3	LILRB1	STK11	ZFP36L2	JMJD6	NBEAL2	NFKBIA	SEMA4A	AP3D1	NOTCH1	LILRB4	ADRM1	MKNK2	CXCL2	TFE3	TGFB1	CD4	KLF10
GO:0043299	leukocyte degranulation	2.335e-09	1.6e-05	9.41e-07	8.854e-06	18	75	ABR	PI4K2A	PRAM1	FES	CCL3	FGR	MYO1F	STX11	UNC13D	STXBP2	HCK	HMOX1	PLD2	LAT2	GAB2	LAMP1	NR4A3	LGALS9
GO:0006955	immune response	2.743e-09	1.88e-05	1.044e-06	9.826e-06	118	1577	PIK3AP1	ERCC1	ABR	C19orf66	LILRB2	PI4K2A	ADA	ADAM8	ADM	IRF9	PRAM1	TUBB4B	DEFB125	FES	CCL3	CCL11	FGR	CLEC10A	STOML2	SECTM1	FOS	OTUB1	APOA2	SBNO2	RBCK1	SIRT2	ARRB2	TNFSF13B	PYCARD	MYO1F	STX11	CD300E	MYO1G	MYD88	PRELID1	DEFB118	SIGLEC9	ADAM15	GAS6	UNC13D	BCL3	LILRB1
GO:0002366	leukocyte activation involved in immune response	2.984e-09	2.045e-05	1.076e-06	1.013e-05	33	236	ERCC1	ABR	PI4K2A	ADA	PRAM1	FES	CCL3	FGR	SBNO2	PYCARD	MYO1F	STX11	UNC13D	BCL3	LILRB1	STXBP2	SEMA4A	ICOSLG	TGFB1	TNFAIP3	HMOX1	TYROBP	PLD2	LAT2	ICAM1	GAB2	JAK3	RARA	LAMP1	NR4A3	DLL1	LGALS1	LGALS9
GO:0002263	cell activation involved in immune response	3.705e-09	2.539e-05	1.219e-06	1.147e-05	33	238	ERCC1	ABR	PI4K2A	ADA	PRAM1	FES	CCL3	FGR	SBNO2	PYCARD	MYO1F	STX11	UNC13D	BCL3	LILRB1	STXBP2	SEMA4A	ICOSLG	TGFB1	TNFAIP3	HMOX1	TYROBP	PLD2	LAT2	ICAM1	GAB2	JAK3	RARA	LAMP1	NR4A3	DLL1	LGALS1	LGALS9
GO:0002682	regulation of immune system process	3.736e-09	2.56e-05	1.219e-06	1.147e-05	114	1514	PIK3AP1	ABR	SLC35C1	LILRB2	GMIP	ADA	ADAM8	PRAM1	AP2A1	HIST1H3E	AP1B1	HIST1H4D	MAD1L1	MITF	FES	CCL3	FGR	STOML2	ZC3H12A	FOS	APOA2	RBCK1	ARRB2	KLF13	TNFSF13B	PYCARD	MYO1F	IRS2	CD300E	MYO1G	MYD88	ATP6AP1	PRELID1	SPI1	SIGLEC9	GAS6	UNC13D	LILRB1	VSIR	CD300C	STK11	CYFIP1
GO:0032496	response to lipopolysaccharide	4.072e-09	2.79e-05	1.268e-06	1.193e-05	41	342	ABR	LILRB2	ADM	CCL3	ALAD	ZC3H12A	FOS	SBNO2	PYCARD	MYD88	LILRB1	NFKBIA	NFKBIB	C5AR1	NOTCH1	SASH1	SOCS3	CXCL2	TGFB1	MTA1	CD14	TNFAIP3	RELT	HCK	PDE4B	CEBPB	NOCT	HSF1	CNP	COMT	ICAM1	MAPK3	IL10RA	PTGIR	JUNB	JUND	MAPKAPK3	PLSCR3	RARA	LGALS9	TRPV4
GO:0006897	endocytosis	5.618e-09	3.849e-05	1.674e-06	1.575e-05	63	667	RIN3	ABR	2017-03-02	ACTN4	ADM	GRK2	AP2A1	FGR	CLEC10A	ANXA11	RAB20	MSR1	ARRB2	ASGR2	PYCARD	MYO1G	MYH9	GAK	MYO1E	SIGLEC9	GAS6	UNC13D	LILRB1	CYFIP1	RAB4B	JMJD6	LOXL3	GRN	PIP5K1C	TGFB1	UNC119	THBS1	CD14	HCK	PACSIN2	HIP1	PDLIM7	CLTB	NR1H2	PLD2	EPN1	VEGFA
GO:1902680	positive regulation of RNA biosynthetic process	8.145e-09	5.581e-05	2.325e-06	2.188e-05	115	1553	ERBB4	ERCC2	RPS6KA1	ETS2	ACVRL1	ADAM8	CXXC1	RXRA	MEF2D	AXIN1	GLMP	MITF	FOXO4	MAD2L2	DDX41	TADA3	ZC3H12A	KAT5	FOS	FOSL2	CAMK1	SBNO2	RBCK1	PHOX2A	SIRT2	KLF13	PYCARD	SMARCA4	SMARCD3	ZFHX3	ATF3	SNAI1	DOT1L	MUC1	MYD88	SPI1	BAG1	SREBF1	SRF	NDP	BCL3	RUVBL2
GO:1901701	cellular response to oxygen-containing compound	1.015e-08	6.952e-05	2.781e-06	2.617e-05	83	1002	AOC1	LILRB2	TCIRG1	RXRA	RAB8A	GRK2	CCL3	FOXO4	STK25	ADCY4	ZC3H12A	KAT5	FOS	SIPA1	SBNO2	SIRT2	PYCARD	SMARCA4	IRS2	WDTC1	MYD88	ATP6V0B	ATP6AP1	SPI1	GAS6	SREBF1	SRF	RUVBL2	LILRB1	NFKBIA	NFKBIB	GNB2	GNG3	SASH1	ADRM1	SOCS3	NR4A2	TGFB1	THBS1	KLF10	CD14	TIAM1
GO:0002520	immune system development	1.225e-08	8.394e-05	3.149e-06	2.963e-05	80	956	ERCC1	ERCC2	LILRB2	RRAS	ADA	ADAM8	HIST1H4D	MAD1L1	MITF	FES	CCL3	PREX1	FOS	SBNO2	KLF13	SMARCA4	G6PD	MYH9	ATP6AP1	PRELID1	SPI1	MYO1E	GAS6	SRF	BCL3	LILRB1	STK11	ZFP36L2	JMJD6	NBEAL2	NFKBIA	SEMA4A	AP3D1	NOTCH1	LILRB4	ICOSLG	ADRM1	MKNK2	CXCL2	TFE3	TGFB1	CD4
GO:0051254	positive regulation of RNA metabolic process	1.249e-08	8.557e-05	3.149e-06	2.963e-05	117	1601	ERBB4	ERCC2	RPS6KA1	ETS2	ACVRL1	ADAM8	CXXC1	RXRA	MEF2D	AXIN1	GLMP	MITF	FOXO4	MAD2L2	DDX41	TADA3	ZC3H12A	KAT5	FOS	FOSL2	CAMK1	SBNO2	RBCK1	PHOX2A	SIRT2	KLF13	PYCARD	SMARCA4	SMARCD3	ZFHX3	ATF3	SNAI1	DOT1L	MUC1	MYD88	SPI1	BAG1	SREBF1	SRF	NDP	BCL3	RUVBL2
GO:0030097	hemopoiesis	1.287e-08	8.818e-05	3.149e-06	2.963e-05	74	858	ERCC1	ERCC2	LILRB2	RRAS	ADA	ADAM8	HIST1H4D	MITF	FES	CCL3	PREX1	FOS	SBNO2	KLF13	SMARCA4	G6PD	MYH9	ATP6AP1	PRELID1	SPI1	MYO1E	GAS6	SRF	BCL3	LILRB1	STK11	ZFP36L2	JMJD6	NBEAL2	NFKBIA	SEMA4A	AP3D1	NOTCH1	LILRB4	ADRM1	MKNK2	CXCL2	TFE3	TGFB1	CD4	KLF10	NARFL
GO:1902533	positive regulation of intracellular signal transduction	1.343e-08	9.205e-05	3.174e-06	2.987e-05	80	958	PIK3AP1	ERBB4	SPRED2	ACTN4	ADA	ADAM8	MAP3K3	AXIN1	S100A4	MAP3K11	CCL3	CCL11	FGR	STK25	SECTM1	TRAF7	FLNA	ZC3H12A	CCDC22	ZNF622	ARAF	RBCK1	RHOC	ARRB2	PYCARD	MYD88	GADD45B	PLK2	ATP6AP1	GAS6	BID	C5AR1	GNG3	NOTCH1	SASH1	GPX1	SOCS3	MAP3K6	TGFB1	OSM	THBS1	CD4
GO:0032270	positive regulation of cellular protein metabolic process	1.39e-08	9.527e-05	3.176e-06	2.988e-05	112	1514	ERBB4	JDP2	ACVRL1	ADAM8	RXRA	MAP3K3	AXIN1	MAP3K11	CCL3	CCL11	MAD2L2	STK25	TRAF7	ADCY4	ZC3H12A	CCDC22	KAT5	ZNF622	CAMK1	ARAF	SIRT2	ARRB2	PYCARD	SUMO3	MUC1	MYD88	GADD45B	ZFAND2A	VPS11	PLK2	MYH9	ATP6AP1	PRELID1	GAS6	SREBF1	BCL3	RUVBL2	ARID5A	GFRA2	BID	STK11	BMP3
GO:0023056	positive regulation of signaling	1.57e-08	0.0001075	3.469e-06	3.264e-05	120	1662	PIK3AP1	EPS8	ERBB4	SPRED2	ACTN4	ACVRL1	ADA	ADAM8	MAP3K3	AXIN1	S100A4	MAP3K11	CCL3	CCL11	FGR	ARAP1	STK25	SECTM1	TRAF7	FLNA	ZC3H12A	CCDC22	SH3BP2	ZNF622	ARAF	RBCK1	RHOC	ARHGAP1	ARHGAP4	UBE2O	ARRB2	PYCARD	SMARCA4	ATF3	IRS2	MYD88	GADD45B	PLK2	ATP6AP1	GAS6	ZC3H3	VSIR
GO:0043408	regulation of MAPK cascade	1.867e-08	0.0001279	3.881e-06	3.652e-05	66	736	PIK3AP1	ERBB4	SPRED2	RRAS	ADAM8	MAP3K3	AXIN1	MAP3K11	CCL3	CCL11	FEM1A	STK25	TRAF7	ZC3H12A	ZNF622	ARAF	ARRB2	PYCARD	ATF3	MYD88	GADD45B	ATP6AP1	GAS6	BMP3	C5AR1	GNG3	SASH1	GPS1	MAP3K6	TGFB1	OSM	THBS1	TIAM1	AVPI1	RELT	PIK3R5	TPD52L1	LPAR3	PER1	PIN1	VEGFA	ICAM1
GO:1901698	response to nitrogen compound	1.869e-08	0.0001281	3.881e-06	3.652e-05	81	982	AOC1	TCIRG1	ADA	RXRA	RAB8A	ADM	GRK2	FOXO4	ALAD	MMP19	CARM1	ADCY4	ZC3H12A	FOS	SLC3A2	SIRT2	MTHFR	IRS2	WDTC1	MYD88	ATP6V0B	ATP6AP1	SREBF1	BSG	NFKBIA	PPP1R9B	C5AR1	GNB2	GNG3	NOTCH1	GPI	ADRM1	SOCS3	NR4A2	TGFB1	THBS1	KLF10	P2RX1	TIAM1	NEURL1	TNFAIP3	CDKN1A
GO:0010243	response to organonitrogen compound	1.99e-08	0.0001363	4.01e-06	3.773e-05	74	867	AOC1	TCIRG1	ADA	RXRA	RAB8A	ADM	FOXO4	ALAD	MMP19	CARM1	ADCY4	FOS	SIRT2	MTHFR	IRS2	WDTC1	MYD88	ATP6V0B	ATP6AP1	SREBF1	BSG	NFKBIA	PPP1R9B	C5AR1	GNB2	GNG3	NOTCH1	GPI	ADRM1	SOCS3	NR4A2	KLF10	P2RX1	TIAM1	NEURL1	TNFAIP3	CDKN1A	PDE4B	CEBPB	PER1	HMBS	ATP6V1F
GO:0007167	enzyme linked receptor protein signaling pathway	2.361e-08	0.0001618	4.622e-06	4.349e-05	83	1021	EPS8	ERBB4	SPRED2	TCIRG1	ACVRL1	AXIN1	AP2A1	FES	FOXO4	FGR	ARAP1	GIT1	FOS	RNF126	SIRT2	UBE2O	ARRB2	IRS2	MYD88	ATP6V0B	ATP6AP1	MYO1E	GAS6	SREBF1	ZC3H3	VSIR	GFRA2	SHKBP1	STK11	BMP3	CYFIP1	NOTCH1	ANKS1A	ADRM1	SOCS3	DOK2	NCSTN	TGFB1	THBS1	CD4	KLF10	TIAM1
GO:0043085	positive regulation of catalytic activity	2.798e-08	0.0001917	5.281e-06	4.969e-05	115	1588	ERBB4	RIN3	ABR	RGS19	TBC1D2	GMIP	ADAM8	MAP3K3	AXIN1	MAP3K11	CCL3	CCL11	FGR	SIPA1L2	PREX1	ARAP1	TRAF7	ADCY4	GIT1	ZNF622	APOA2	CAMK1	SIPA1	ARAF	RHOC	ARHGAP1	ARHGAP4	RANGRF	PYCARD	IRS2	GADD45B	TBC1D9B	PRELID1	MYO9B	GAS6	TBC1D2B	RCC2	GFRA2	BID	STK11	RGL1	TBC1D1
GO:0045893	positive regulation of transcription, DNA-templated	2.929e-08	0.0002007	5.281e-06	4.969e-05	112	1535	ERBB4	ERCC2	RPS6KA1	ETS2	ACVRL1	ADAM8	CXXC1	RXRA	MEF2D	AXIN1	GLMP	MITF	FOXO4	MAD2L2	DDX41	TADA3	ZC3H12A	KAT5	FOS	FOSL2	CAMK1	SBNO2	RBCK1	PHOX2A	SIRT2	KLF13	PYCARD	SMARCA4	SMARCD3	ZFHX3	ATF3	SNAI1	DOT1L	MUC1	MYD88	SPI1	BAG1	SREBF1	SRF	NDP	BCL3	RUVBL2
GO:1903508	positive regulation of nucleic acid-templated transcription	2.929e-08	0.0002007	5.281e-06	4.969e-05	112	1535	ERBB4	ERCC2	RPS6KA1	ETS2	ACVRL1	ADAM8	CXXC1	RXRA	MEF2D	AXIN1	GLMP	MITF	FOXO4	MAD2L2	DDX41	TADA3	ZC3H12A	KAT5	FOS	FOSL2	CAMK1	SBNO2	RBCK1	PHOX2A	SIRT2	KLF13	PYCARD	SMARCA4	SMARCD3	ZFHX3	ATF3	SNAI1	DOT1L	MUC1	MYD88	SPI1	BAG1	SREBF1	SRF	NDP	BCL3	RUVBL2
GO:0010647	positive regulation of cell communication	3.293e-08	0.0002257	5.786e-06	5.445e-05	120	1684	PIK3AP1	EPS8	ERBB4	SPRED2	ACTN4	ACVRL1	ADA	ADAM8	MAP3K3	AXIN1	S100A4	MAP3K11	CCL3	CCL11	FGR	ARAP1	STK25	SECTM1	TRAF7	FLNA	ZC3H12A	CCDC22	SH3BP2	ZNF622	ARAF	RBCK1	RHOC	ARHGAP1	ARHGAP4	UBE2O	ARRB2	PYCARD	SMARCA4	ATF3	IRS2	MYD88	GADD45B	PLK2	ATP6AP1	GAS6	ZC3H3	VSIR
GO:0031328	positive regulation of cellular biosynthetic process	3.787e-08	0.0002595	6.476e-06	6.094e-05	133	1929	ERBB4	ERCC2	RPS6KA1	ETS2	ACVRL1	ADAM8	CXXC1	RXRA	MEF2D	AXIN1	GLMP	ADM	MITF	FOXO4	MAD2L2	DDX41	TADA3	STOML2	ADCY4	ZC3H12A	KAT5	FOS	FOSL2	APOA2	CAMK1	SBNO2	RBCK1	PHOX2A	SIRT2	ARRB2	KLF13	PYCARD	SMARCA4	SMARCD3	ZFHX3	ATF3	IRS2	SNAI1	DOT1L	MUC1	DGAT1	MYD88
GO:0007169	transmembrane receptor protein tyrosine kinase signaling pathway	3.875e-08	0.0002655	6.476e-06	6.094e-05	63	702	EPS8	ERBB4	SPRED2	TCIRG1	AP2A1	FES	FOXO4	FGR	ARAP1	GIT1	RNF126	SIRT2	IRS2	ATP6V0B	ATP6AP1	MYO1E	SREBF1	GFRA2	SHKBP1	CYFIP1	NOTCH1	ANKS1A	ADRM1	SOCS3	DOK2	NCSTN	TGFB1	THBS1	CD4	TIAM1	NEURL1	FIBP	HCK	RASGRP4	ATP6V1F	TYK2	CSRNP1	PLAUR	EPN1	VEGFA	DDIT4	POLR2E
GO:0045935	positive regulation of nucleobase-containing compound metabolic process	4.314e-08	0.0002956	7.014e-06	6.6e-05	128	1840	ERBB4	ERCC1	ERCC2	RPS6KA1	ETS2	ACVRL1	ADAM8	CXXC1	RXRA	MEF2D	AXIN1	GLMP	ADM	MITF	FOXO4	MAD2L2	DDX41	TADA3	STOML2	ADCY4	ZC3H12A	KAT5	FOS	FOSL2	CAMK1	SBNO2	RBCK1	PHOX2A	SIRT2	ARRB2	KLF13	PYCARD	SMARCA4	SMARCD3	ZFHX3	ATF3	SNAI1	DOT1L	MUC1	MYD88	SPI1	BAG1
GO:0010557	positive regulation of macromolecule biosynthetic process	4.402e-08	0.0003016	7.014e-06	6.6e-05	125	1785	ERBB4	ERCC2	RPS6KA1	ETS2	ACVRL1	ADAM8	CXXC1	RXRA	MEF2D	AXIN1	GLMP	MITF	FOXO4	MAD2L2	DDX41	TADA3	STOML2	ZC3H12A	KAT5	FOS	FOSL2	APOA2	CAMK1	SBNO2	RBCK1	PHOX2A	SIRT2	ARRB2	KLF13	PYCARD	SMARCA4	SMARCD3	ZFHX3	ATF3	IRS2	SNAI1	DOT1L	MUC1	MYD88	SPI1	BAG1	SREBF1
GO:0031399	regulation of protein modification process	5.37e-08	0.0003679	8.362e-06	7.869e-05	128	1847	PIK3AP1	ERBB4	SPRED2	JDP2	RRAS	ACVRL1	ADAM8	MAP3K3	AXIN1	HMG20B	MAP3K11	CCL3	CCL11	MAD2L2	FGR	FEM1A	TADA3	STK25	TRAF7	ADCY4	ZC3H12A	CCDC22	KAT5	OTUB1	ZNF622	PPP6R1	CAMK1	LRRC4C	ARAF	SIRT2	ARRB2	MTHFR	PYCARD	ATF3	SUMO3	MUC1	G6PD	MYD88	GADD45B	ATP6AP1	SPI1	BAG1
GO:0030099	myeloid cell differentiation	5.6e-08	0.0003837	8.526e-06	8.023e-05	42	389	ERCC2	ADAM8	HIST1H4D	MITF	FES	CCL3	FOS	SBNO2	KLF13	SMARCA4	G6PD	MYH9	ATP6AP1	SPI1	SRF	LILRB1	JMJD6	NBEAL2	NFKBIA	LILRB4	TFE3	TGFB1	KLF10	HBZ	RASGRP4	CEBPB	TYROBP	VEGFA	ZFP36	CSF1R	IL11	IRF7	ITGAM	GAB2	JUNB	FAM20C	MAFB	TESC	RARA	LRRK1	DLL1	LGALS9
GO:0043410	positive regulation of MAPK cascade	5.726e-08	0.0003923	8.529e-06	8.025e-05	51	522	ERBB4	ADAM8	MAP3K3	AXIN1	MAP3K11	CCL3	CCL11	STK25	TRAF7	ZC3H12A	ZNF622	ARAF	ARRB2	PYCARD	MYD88	GADD45B	ATP6AP1	GAS6	C5AR1	GNG3	SASH1	MAP3K6	TGFB1	OSM	THBS1	TIAM1	AVPI1	RELT	PIK3R5	TPD52L1	LPAR3	VEGFA	ICAM1	CSF1R	IGFBP4	PIK3R6	CSK	PKN1	MAPK3	MAP2K2	MAP2K3	MAP2K7
GO:0006357	regulation of transcription from RNA polymerase II promoter	9.554e-08	0.0006546	1.393e-05	0.0001311	131	1922	ERCC2	RPS6KA1	ETS2	JDP2	ACVRL1	RXRA	MEF2D	AXIN1	GLMP	MITF	FOXO4	MAD2L2	DDX41	TADA3	TRAF7	ZC3H12A	KAT5	FOS	FOSL2	CBX4	CAMK1	DRAP1	SBNO2	RBCK1	MED15	PHOX2A	SIRT2	UBE2O	MED19	KLF13	TCF25	SMARCA4	SMARCD2	SMARCD3	ZFHX3	ATF3	SNAI1	DOT1L	MUC1	WDTC1	SPI1	BAG1
GO:0009611	response to wounding	1.152e-07	0.0007893	1.644e-05	0.0001547	78	973	PIK3AP1	ERBB4	ABR	ACVRL1	DYSF	ADA	ADAM8	RXRA	HMG20B	ADM	HIST1H3E	CCL3	CCL11	CLEC10A	FEM1A	FLNA	ZC3H12A	SBNO2	RHOC	ARRB2	PYCARD	MYD88	MYH9	SIGLEC9	ADAM15	GAS6	SRF	XYLT1	IER3	NBEAL2	NINJ1	C5AR1	NOTCH1	GPX1	SOCS3	PIP5K1C	PAPSS2	TGFB1	OSM	THBS1	MTA1	P2RX1
GO:0009891	positive regulation of biosynthetic process	1.187e-07	0.0008135	1.655e-05	0.0001557	133	1967	ERBB4	ERCC2	RPS6KA1	ETS2	ACVRL1	ADAM8	CXXC1	RXRA	MEF2D	AXIN1	GLMP	ADM	MITF	FOXO4	MAD2L2	DDX41	TADA3	STOML2	ADCY4	ZC3H12A	KAT5	FOS	FOSL2	APOA2	CAMK1	SBNO2	RBCK1	PHOX2A	SIRT2	ARRB2	KLF13	PYCARD	SMARCA4	SMARCD3	ZFHX3	ATF3	IRS2	SNAI1	DOT1L	MUC1	DGAT1	MYD88
GO:0002252	immune effector process	1.208e-07	0.0008274	1.655e-05	0.0001557	71	856	ERCC1	ABR	C19orf66	SLC35C1	PI4K2A	GMIP	ADA	IRF9	PRAM1	TUBB4B	AP2A1	HIST1H3E	AP1B1	FES	CCL3	FGR	DDX41	ZC3H12A	APOA2	SBNO2	ARRB2	PYCARD	MYO1F	STX11	MYO1G	MYD88	UNC13D	BCL3	LILRB1	CRLF2	VSIR	CYFIP1	STXBP2	AP1M1	C5AR1	SEMA4A	ICOSLG	CXCL2	TGFB1	CD4	TNFAIP3	SLC25A19
GO:0002521	leukocyte differentiation	1.248e-07	0.0008554	1.671e-05	0.0001572	51	535	LILRB2	RRAS	ADA	ADAM8	MITF	CCL3	PREX1	FOS	SBNO2	MYH9	ATP6AP1	PRELID1	SPI1	GAS6	SRF	BCL3	LILRB1	STK11	ZFP36L2	JMJD6	SEMA4A	AP3D1	LILRB4	ADRM1	TFE3	TGFB1	CD4	KLF10	TNFAIP3	CEBPB	TYROBP	SASH3	VEGFA	POU2F2	CSF1R	PIK3R6	IL11	IL15RA	IRF7	ITGAM	GAB2	JAK3
GO:0002274	myeloid leukocyte activation	1.268e-07	0.0008689	1.671e-05	0.0001572	26	185	ABR	PI4K2A	PRAM1	FES	CCL3	FGR	PREX1	ZC3H12A	SBNO2	PYCARD	MYO1F	STX11	SPI1	UNC13D	STXBP2	JMJD6	TGFB1	THBS1	HMOX1	TYROBP	PLD2	LAT2	GAB2	PTPRE	NR4A3	LGALS9
GO:1903706	regulation of hemopoiesis	1.393e-07	0.0009546	1.801e-05	0.0001695	40	373	LILRB2	ADA	ADAM8	HIST1H4D	MITF	FES	CCL3	FOS	KLF13	ATP6AP1	PRELID1	SPI1	GAS6	LILRB1	NFKBIA	AP3D1	NOTCH1	LILRB4	ADRM1	CXCL2	TFE3	TGFB1	KLF10	CEBPB	TYROBP	SASH3	PIM1	VEGFA	ZFP36	CSF1R	PIK3R6	IL15RA	IRF7	JAK3	MAFB	TESC	RARA	DLL1	LGALS1	LGALS9
GO:0000165	MAPK cascade	1.551e-07	0.001063	1.968e-05	0.0001852	75	929	PIK3AP1	ERBB4	SPRED2	RRAS	ADAM8	MAP3K3	AXIN1	MAP3K11	CCL3	CCL11	FEM1A	STK25	TRAF7	ZC3H12A	ZNF622	ARAF	ARRB2	PYCARD	ATF3	IRS2	MYD88	GADD45B	ATP6AP1	GAS6	GFRA2	BMP3	C5AR1	GNG3	SASH1	GPS1	DOK2	MAP3K6	TGFB1	OSM	THBS1	TIAM1	AVPI1	RELT	PIK3R5	TPD52L1	LPAR3	RASGRP4
GO:0032940	secretion by cell	2.247e-07	0.001539	2.799e-05	0.0002634	84	1093	ABR	PI4K2A	ACTN4	ADAM8	RAB8A	ADM	PRAM1	GRK2	FES	CCL3	FGR	ALDOA	FLNA	ZC3H12A	APOA2	YKT6	TNFSF13B	PYCARD	MYO1F	IRS2	STX11	DGAT1	MYO1G	VPS11	ATP6AP1	GAS6	SREBF1	NAPA	UNC13D	LILRB1	CRLF2	NPVF	CD300C	STXBP2	GLUL	EXOC7	NOTCH1	NTSR1	PIP5K1C	TGFB1	OSM	THBS1
GO:0051173	positive regulation of nitrogen compound metabolic process	2.368e-07	0.001623	2.898e-05	0.0002727	131	1953	ERBB4	ERCC1	ERCC2	RPS6KA1	ETS2	ACVRL1	ADAM8	CXXC1	RXRA	MEF2D	AXIN1	GLMP	ADM	MITF	FOXO4	MAD2L2	DDX41	TADA3	STOML2	ADCY4	ZC3H12A	KAT5	FOS	FOSL2	CAMK1	SBNO2	RBCK1	PHOX2A	SIRT2	ARRB2	KLF13	PYCARD	SMARCA4	SMARCD3	ZFHX3	ATF3	SNAI1	DOT1L	MUC1	MYD88	SPI1	BAG1
GO:0009991	response to extracellular stimulus	2.513e-07	0.001722	3.021e-05	0.0002842	56	626	ERCC1	AOC1	ADA	RXRA	ADM	ALAD	ALOX5	ZC3H12A	FOS	SIPA1	RAB20	SIRT2	ARSA	MTHFR	ATF3	G6PD	ATP6V0B	GAS6	SREBF1	SRF	GLUL	PPP1R9B	EXOC7	CAPN1	CAPNS1	SOCS3	NR4A2	TGFB1	CD4	KLF10	CDKN1A	RASGRP4	HMBS	HMOX1	SLC38A2	PIM1	PKM	PLEC	NOCT	USF1	USF2	RNF152
GO:0043068	positive regulation of programmed cell death	2.637e-07	0.001807	3.116e-05	0.0002932	58	659	ERBB4	ABR	ADAM8	RXRA	ADM	MAP3K11	CCL3	TRAF7	ZC3H12A	ZNF622	RBCK1	ARHGAP4	SIRT2	PYCARD	MARK4	ATF3	GADD45B	PRELID1	BAG1	SIK1	LILRB1	BID	NOTCH1	NTSR1	NCSTN	TGFB1	OSM	THBS1	P2RX1	TIAM1	NACC2	NEURL1	TPD52L1	CDKN1A	HIP1	TRIO	HMOX1	NR4A1	TFPT	PIN1	PLAUR	HSF1
GO:0045944	positive regulation of transcription from RNA polymerase II promoter	2.83e-07	0.001939	3.287e-05	0.0003093	84	1099	ERCC2	RPS6KA1	ETS2	ACVRL1	RXRA	MEF2D	GLMP	MITF	FOXO4	DDX41	ZC3H12A	KAT5	FOS	FOSL2	CAMK1	SBNO2	RBCK1	PHOX2A	SIRT2	KLF13	SMARCA4	ATF3	DOT1L	MUC1	SPI1	BAG1	SREBF1	SRF	BCL3	RUVBL2	LILRB1	ARID5A	BMP3	NFKBIA	NOTCH1	RPS6KA4	NR4A2	TFE3	TGFB1	OSM	HCFC1	WBP2
GO:0043069	negative regulation of programmed cell death	3.054e-07	0.002092	3.483e-05	0.0003277	74	928	ERBB4	RPS6KA1	ADA	ADAM8	MITF	FLNA	ZC3H12A	CBX4	ARAF	RBCK1	SIRT2	ARRB2	SMARCA4	IRS2	SNAI1	MUC1	MYD88	PLK2	PRELID1	BAG1	GAS6	BCL3	LILRB1	IER3	NFKBIA	C5AR1	NOTCH1	GPI	NTSR1	GPX1	SOCS3	NR4A2	GRINA	THBS1	TNFAIP3	HCK	CDKN1A	TPT1	HK1	CEBPB	HMOX1	NR4A1
GO:0030316	osteoclast differentiation	3.148e-07	0.002157	3.483e-05	0.0003277	18	101	ADAM8	MITF	CCL3	FOS	SBNO2	ATP6AP1	LILRB1	LILRB4	TFE3	KLF10	CEBPB	TYROBP	CSF1R	GAB2	JUNB	FAM20C	MAFB	LRRK1
GO:0023014	signal transduction by protein phosphorylation	3.151e-07	0.002159	3.483e-05	0.0003277	76	963	PIK3AP1	ERBB4	SPRED2	RRAS	ACVRL1	ADAM8	MAP3K3	AXIN1	MAP3K11	CCL3	CCL11	FEM1A	STK25	TRAF7	ZC3H12A	ZNF622	ARAF	ARRB2	PYCARD	ATF3	IRS2	MYD88	GADD45B	ATP6AP1	GAS6	GFRA2	BMP3	C5AR1	GNG3	SASH1	GPS1	DOK2	MAP3K6	TGFB1	OSM	THBS1	TIAM1	AVPI1	RELT	PIK3R5	TPD52L1	LPAR3
GO:0043066	negative regulation of apoptotic process	3.47e-07	0.002378	3.774e-05	0.0003552	73	914	ERBB4	RPS6KA1	ADA	ADAM8	MITF	FLNA	ZC3H12A	CBX4	ARAF	SIRT2	ARRB2	SMARCA4	IRS2	SNAI1	MUC1	MYD88	PLK2	PRELID1	BAG1	GAS6	BCL3	LILRB1	IER3	NFKBIA	C5AR1	NOTCH1	GPI	NTSR1	GPX1	SOCS3	NR4A2	GRINA	THBS1	TNFAIP3	HCK	CDKN1A	TPT1	HK1	CEBPB	HMOX1	NR4A1	PIM1
GO:0046903	secretion	3.706e-07	0.002539	3.964e-05	0.000373	91	1230	ERBB4	ABR	PI4K2A	ACTN4	ADA	ADAM8	RAB8A	ADM	PRAM1	GRK2	FES	CCL3	FGR	ALDOA	FLNA	ZC3H12A	APOA2	YKT6	TNFSF13B	PYCARD	MYO1F	IRS2	STX11	DGAT1	MYO1G	VPS11	ATP6AP1	GAS6	SREBF1	NAPA	UNC13D	LILRB1	CRLF2	NPVF	CD300C	STXBP2	GLUL	EXOC7	NOTCH1	NTSR1	PIP5K1C	TGFB1
GO:0009719	response to endogenous stimulus	3.775e-07	0.002587	3.964e-05	0.000373	119	1743	AOC1	SPRED2	TCIRG1	ACVRL1	ADA	RXRA	AXIN1	RAB8A	ADM	FOXO4	ALAD	MMP19	TADA3	CARM1	ADCY4	KAT5	FOS	FOSL2	APOA2	SIRT2	UBE2O	ARRB2	ARSA	MTHFR	SMARCA4	ZFHX3	IRS2	WDTC1	MYD88	ATP6V0B	ATP6AP1	SREBF1	SRF	SIK1	RUVBL2	VSIR	BID	STK11	BMP3	BSG	NFKBIA	PPP1R9B
GO:0045595	regulation of cell differentiation	3.818e-07	0.002616	3.964e-05	0.000373	117	1706	ERBB4	MAP1B	LILRB2	RPS6KA1	JDP2	ACTN4	ACVRL1	ADA	ADAM8	AXIN1	HMG20B	ADM	HIST1H4D	MITF	FES	CCL3	FOXO4	MAD2L2	PREX1	STK25	CARM1	FLNA	ZC3H12A	FOS	ENC1	CAMK1	LRRC4C	MSR1	ARHGAP4	SIRT2	KLF13	SMARCA4	SMARCD3	ZFHX3	SNAI1	G6PD	PLK2	GAK	ATP6AP1	PRELID1	SPI1	GAS6
GO:1901652	response to peptide	3.984e-07	0.00273	4.074e-05	0.0003834	46	478	TCIRG1	RXRA	RAB8A	ADM	FOXO4	ADCY4	IRS2	WDTC1	ATP6V0B	ATP6AP1	SREBF1	BSG	NFKBIA	GNB2	GNG3	NOTCH1	ADRM1	SOCS3	NR4A2	KLF10	TNFAIP3	ATP6V1F	NR4A1	SERPINA1	PKM	PLD2	USF1	HSF1	POR	SOGA1	CSK	MAPK3	CTSB	SLC26A6	CYC1	INPPL1	IRF5	JAK3	JUNB	JUND	PTPRE	RAB13
GO:0050776	regulation of immune response	4.287e-07	0.002937	4.319e-05	0.0004064	72	902	PIK3AP1	ABR	LILRB2	ADA	ADAM8	PRAM1	FES	FGR	STOML2	FOS	APOA2	RBCK1	ARRB2	TNFSF13B	PYCARD	MYO1F	CD300E	MYO1G	MYD88	SIGLEC9	UNC13D	LILRB1	VSIR	CD300C	STK11	CYFIP1	STXBP2	NFKBIA	C5AR1	GPX1	SOCS3	TGFB1	CD4	CD14	TNFAIP3	HCK	PDE4B	VSIG4	OSCAR	CFP	HMOX1	TYK2
GO:0006952	defense response	4.43e-07	0.003036	4.399e-05	0.000414	114	1655	PIK3AP1	ABR	C19orf66	SLC35C1	LILRB2	TCIRG1	GMIP	ADA	ADAM8	RXRA	ADM	IRF9	TUBB4B	AP2A1	HIST1H3E	AP1B1	DEFB125	FES	CCL3	CCL11	FGR	CLEC10A	DDX41	FEM1A	ALOX5	ZC3H12A	FOS	APOA2	SBNO2	SIRT2	ARRB2	PYCARD	MYO1F	STX11	NLRP4	CD300E	MYD88	DEFB118	SIGLEC9	ADAM15	UNC13D	BCL3
GO:0002444	myeloid leukocyte mediated immunity	4.585e-07	0.003142	4.488e-05	0.0004223	17	93	ABR	PI4K2A	PRAM1	FES	CCL3	FGR	MYO1F	STX11	UNC13D	STXBP2	CXCL2	HMOX1	PLD2	LAT2	GAB2	NR4A3	LGALS9
GO:0010628	positive regulation of gene expression	4.665e-07	0.003197	4.502e-05	0.0004236	127	1901	ERBB4	ERCC2	RPS6KA1	ETS2	ACVRL1	ADAM8	CXXC1	RXRA	MEF2D	AXIN1	GLMP	HIST1H3E	HIST1H4D	MITF	CCL3	FOXO4	MAD2L2	DDX41	TADA3	ZC3H12A	KAT5	FOS	FOSL2	CAMK1	SBNO2	RBCK1	PHOX2A	SIRT2	KLF13	PYCARD	SMARCA4	SMARCD3	ZFHX3	ATF3	SNAI1	DOT1L	MUC1	MYD88	MYH9	SPI1	BAG1	GAS6
GO:0001932	regulation of protein phosphorylation	5.891e-07	0.004037	5.57e-05	0.0005241	100	1406	PIK3AP1	ERBB4	SPRED2	RRAS	ACVRL1	ADAM8	MAP3K3	AXIN1	MAP3K11	CCL3	CCL11	MAD2L2	FGR	FEM1A	TADA3	STK25	TRAF7	ADCY4	ZC3H12A	ZNF622	CAMK1	LRRC4C	ARAF	SIRT2	ARRB2	PYCARD	ATF3	MYD88	GADD45B	ATP6AP1	BAG1	GAS6	GFRA2	STK11	BMP3	PPP1R9B	C5AR1	GNG3	RPS6KA4	SASH1	GPS1	SOCS3
GO:0006887	exocytosis	5.934e-07	0.004066	5.57e-05	0.0005241	43	439	ABR	PI4K2A	ACTN4	RAB8A	PRAM1	FES	CCL3	FGR	ALDOA	FLNA	YKT6	MYO1F	STX11	MYO1G	VPS11	ATP6AP1	GAS6	NAPA	UNC13D	STXBP2	EXOC7	NOTCH1	PIP5K1C	TGFB1	THBS1	P2RX1	TLN1	TNFAIP2	HCK	CDK16	HMOX1	SERPINA1	SERPINA4	PLD2	VEGFA	LAT2	GAB2	QSOX1	RAB13	LAMP1	NR4A3	LGALS3BP
GO:0018193	peptidyl-amino acid modification	6.281e-07	0.004303	5.815e-05	0.0005472	91	1245	ERBB4	SPRED2	CXXC1	AXIN1	HMG20B	GRK2	MITF	FES	MCRS1	MAD2L2	FGR	TADA3	CARM1	TRAF7	TPST2	KAT5	APOA2	ST3GAL2	CBX4	CAMK1	ARAF	SIRT2	ARRB2	SMARCA4	SUMO3	DOT1L	MUC1	PLK2	SPI1	GAS6	BLOC1S1	SRCAP	RUVBL2	ARID5A	GFRA2	STK11	JMJD6	RPS6KA4	MKNK2	SOCS3	TGFB1	UNC119
GO:0046649	lymphocyte activation	7.097e-07	0.004863	6.484e-05	0.0006101	60	712	ERCC1	LILRB2	ADA	ADAM8	MAD1L1	PREX1	STOML2	GIT1	TNFSF13B	PYCARD	IRS2	STX11	MYD88	MYH9	PRELID1	SPI1	GAS6	SRF	UNC13D	BCL3	LILRB1	VSIR	STK11	ZFP36L2	JMJD6	SEMA4A	AP3D1	ICOSLG	ADRM1	NCSTN	TGFB1	CD4	CD151	TNFAIP3	CDKN1A	CEBPB	VSIG4	PLA2G2F	SASH3	HPS1	WAS	LAT2
GO:0002573	myeloid leukocyte differentiation	7.325e-07	0.005019	6.604e-05	0.0006215	27	215	ADAM8	MITF	CCL3	FOS	SBNO2	MYH9	ATP6AP1	SPI1	LILRB1	LILRB4	TFE3	TGFB1	KLF10	CEBPB	TYROBP	VEGFA	CSF1R	IRF7	ITGAM	GAB2	JUNB	FAM20C	MAFB	TESC	RARA	LRRK1	LGALS9
GO:0010942	positive regulation of cell death	8.353e-07	0.005724	7.433e-05	0.0006994	59	699	ERBB4	ABR	ADAM8	RXRA	ADM	MAP3K11	CCL3	TRAF7	ZC3H12A	ZNF622	RBCK1	ARHGAP4	SIRT2	PYCARD	MARK4	ATF3	GADD45B	PRELID1	BAG1	SIK1	LILRB1	BID	NOTCH1	NTSR1	NCSTN	TGFB1	OSM	THBS1	P2RX1	TIAM1	NACC2	NEURL1	TPD52L1	CDKN1A	HIP1	TRIO	HMOX1	NR4A1	TFPT	PIN1	PLAUR	HSF1
GO:0043405	regulation of MAP kinase activity	8.831e-07	0.006051	7.758e-05	0.00073	37	356	SPRED2	ADAM8	MAP3K3	AXIN1	MAP3K11	FEM1A	TRAF7	ARAF	GADD45B	C5AR1	GNG3	SASH1	GPS1	MAP3K6	TGFB1	THBS1	TIAM1	AVPI1	PIK3R5	TPD52L1	LPAR3	VEGFA	PPP2R1A	PIK3R6	CSK	PKN1	MAPK3	MAPK7	MAP2K2	MAP2K3	MAP2K7	ILK	INPPL1	CXCR4	MAPKAPK3	DUSP1	DUSP2
GO:0043065	positive regulation of apoptotic process	9.735e-07	0.00667	8.443e-05	0.0007945	56	653	ERBB4	ABR	ADAM8	RXRA	ADM	MAP3K11	CCL3	TRAF7	ZC3H12A	ZNF622	RBCK1	ARHGAP4	SIRT2	PYCARD	ATF3	GADD45B	PRELID1	BAG1	SIK1	LILRB1	BID	NOTCH1	NTSR1	NCSTN	TGFB1	OSM	THBS1	P2RX1	TIAM1	NACC2	NEURL1	TPD52L1	HIP1	TRIO	HMOX1	NR4A1	TFPT	PIN1	PLAUR	HSF1	ADAMTSL4	G0S2
GO:0009617	response to bacterium	1.065e-06	0.007295	9.118e-05	0.000858	52	590	ABR	LILRB2	ADM	DEFB125	CCL3	ALAD	FGR	ZC3H12A	FOS	SBNO2	SIRT2	PYCARD	MYO1F	MYD88	DEFB118	BCL3	LILRB1	NFKBIA	NFKBIB	C5AR1	NOTCH1	SASH1	GPX1	SOCS3	CXCL2	TGFB1	MTA1	CD4	CD14	TNFAIP3	RELT	HCK	PDE4B	CEBPB	CFP	NOCT	HSF1	CNP	COMT	ICAM1	MAPK3	IL10RA
GO:0045055	regulated exocytosis	1.115e-06	0.00764	9.432e-05	0.0008875	34	316	ABR	PI4K2A	ACTN4	PRAM1	FES	CCL3	FGR	ALDOA	FLNA	MYO1F	STX11	GAS6	NAPA	UNC13D	STXBP2	NOTCH1	PIP5K1C	TGFB1	THBS1	P2RX1	TLN1	HCK	HMOX1	SERPINA1	SERPINA4	PLD2	VEGFA	LAT2	GAB2	QSOX1	LAMP1	NR4A3	LGALS3BP	LGALS9
GO:0006468	protein phosphorylation	1.19e-06	0.008153	9.943e-05	0.0009356	128	1954	PIK3AP1	ERBB4	ERCC2	SPRED2	RPS6KA1	BCKDK	RRAS	ACVRL1	ADAM8	MAP3K3	AXIN1	GRK2	FES	MAP3K11	CCL3	CCL11	MAD2L2	FGR	FEM1A	TADA3	STK25	TRAF7	ADCY4	ZC3H12A	ZNF622	CAMK1	LRRC4C	ARAF	SIRT2	ARRB2	PYCARD	MARK4	ATF3	IRS2	MYD88	GADD45B	PLK2	GAK	ATP6AP1	BAG1	GAS6	SIK1
GO:0031401	positive regulation of protein modification process	1.333e-06	0.009137	0.0001101	0.001036	89	1231	ERBB4	JDP2	ACVRL1	ADAM8	MAP3K3	AXIN1	MAP3K11	CCL3	CCL11	MAD2L2	STK25	TRAF7	ADCY4	ZC3H12A	CCDC22	KAT5	ZNF622	CAMK1	ARAF	ARRB2	PYCARD	SUMO3	MUC1	MYD88	GADD45B	ATP6AP1	GAS6	SREBF1	RUVBL2	ARID5A	GFRA2	STK11	BMP3	UBE2S	C5AR1	GNG3	RPS6KA4	SASH1	SOCS3	MAP3K6	TGFB1	UNC119
GO:0009894	regulation of catabolic process	1.385e-06	0.009491	0.000113	0.001063	63	777	ADAM8	AXIN1	YOD1	MAD1L1	MAD2L2	FLNA	ZC3H12A	CCDC22	APOA2	RAB20	ARAF	SIRT2	PYCARD	SUMO3	IRS2	ZFAND2A	VPS11	PLK2	ATP6V0B	SREBF1	USP19	STK11	STX5	ZFP36L2	IER3	OS9	SGSM3	EXOC7	ANKS1A	CAPN1	CAPNS1	GPX1	FURIN	TNFAIP3	HMOX1	TP53INP2	PHKG2	PIN1	HSF1	DDIT4	RNF152	SNX33
GO:0033993	response to lipid	1.711e-06	0.01172	0.0001379	0.001298	77	1024	ABR	LILRB2	RXRA	ADM	CCL3	ALAD	TADA3	CARM1	ZC3H12A	KAT5	FOS	FOSL2	APOA2	SBNO2	ARRB2	ARSA	PYCARD	SMARCA4	MYD88	SREBF1	RUVBL2	LILRB1	BID	STK11	NFKBIA	NFKBIB	C5AR1	NOTCH1	SASH1	NTSR1	SOCS3	NR4A2	GRN	CXCL2	TGFB1	THBS1	MTA1	CD4	CD14	TNFAIP3	RELT	HCK
GO:0031668	cellular response to extracellular stimulus	2.398e-06	0.01643	0.000191	0.001797	26	215	AOC1	ZC3H12A	FOS	SIPA1	SIRT2	ATF3	GAS6	SREBF1	SRF	GLUL	PPP1R9B	NR4A2	KLF10	CDKN1A	HMOX1	SLC38A2	PIM1	USF1	USF2	RNF152	COMT	ICAM1	DAP	DSPP	NUAK2	GSDMD
GO:0042325	regulation of phosphorylation	2.828e-06	0.01938	0.0002227	0.002096	103	1512	PIK3AP1	ERBB4	SPRED2	RRAS	ACVRL1	ADAM8	MAP3K3	AXIN1	MAP3K11	CCL3	CCL11	MAD2L2	FGR	FEM1A	TADA3	STK25	TRAF7	ADCY4	ZC3H12A	ZNF622	CAMK1	LRRC4C	ARAF	SIRT2	ARRB2	PYCARD	ATF3	IRS2	MYD88	GADD45B	ATP6AP1	BAG1	GAS6	GFRA2	STK11	BMP3	IER3	PPP1R9B	C5AR1	GNG3	RPS6KA4	SASH1
GO:0002694	regulation of leukocyte activation	2.973e-06	0.02037	0.0002315	0.002178	46	514	ABR	LILRB2	ADA	ADAM8	PRAM1	MAD1L1	FES	FGR	ZC3H12A	TNFSF13B	PYCARD	IRS2	MYD88	PRELID1	GAS6	UNC13D	LILRB1	VSIR	STXBP2	AP3D1	ICOSLG	ADRM1	TGFB1	THBS1	CD4	TNFAIP3	CDKN1A	CEBPB	VSIG4	PLA2G2F	HMOX1	SASH3	HPS1	PLD2	PIK3R6	CSK	PKN1	IL15RA	GAB2	JAK3	PTPRE	RARA
GO:0002443	leukocyte mediated immunity	3.043e-06	0.02085	0.0002343	0.002205	36	360	ERCC1	ABR	PI4K2A	PRAM1	TUBB4B	FES	CCL3	FGR	ARRB2	MYO1F	STX11	MYO1G	MYD88	UNC13D	BCL3	LILRB1	CRLF2	VSIR	STXBP2	ICOSLG	CXCL2	TGFB1	HMOX1	SASH3	PLD2	WAS	LAT2	ICAM1	POU2F2	PIK3R6	IRF7	GAB2	JAK3	LAMP1	NR4A3	LGALS9
GO:0036230	granulocyte activation	3.309e-06	0.02267	0.0002518	0.00237	9	30	ABR	PI4K2A	PRAM1	CCL3	PREX1	MYO1F	STX11	STXBP2	TYROBP
GO:0031329	regulation of cellular catabolic process	3.345e-06	0.02292	0.0002518	0.00237	55	663	ADAM8	AXIN1	MAD1L1	MAD2L2	ZC3H12A	CCDC22	RAB20	ARAF	SIRT2	PYCARD	SUMO3	IRS2	ZFAND2A	VPS11	PLK2	ATP6V0B	SREBF1	USP19	STK11	ZFP36L2	IER3	EXOC7	ANKS1A	CAPN1	CAPNS1	GPX1	FURIN	TNFAIP3	HMOX1	TP53INP2	PHKG2	HSF1	DDIT4	RNF152	SNX33	CTSA	ZFP36	PPP1CA	SOGA1	MAPK3	MAPK7	HERPUD1
GO:0001701	in utero embryonic development	3.506e-06	0.02403	0.0002612	0.002457	40	423	ERCC2	ACVRL1	ADA	RXRA	AXIN1	ADM	MGAT1	ANKRD11	SMARCA4	SNAI1	WDTC1	MYH9	MYO1E	SRF	NOTCH1	GPI	PLOD3	SOCS3	GRN	CEBPB	SERPINA1	RIC8A	HSF1	EPN1	VEGFA	SLC39A3	NCOR2	GATAD2A	INTS1	PSMC4	XAB2	JUNB	MFN2	TFEB	SCO2	HBEGF	ZMIZ1	DLL1	LY6E	ENO1
GO:0060548	negative regulation of cell death	3.848e-06	0.02637	0.0002835	0.002668	75	1011	ERBB4	RPS6KA1	ADA	ADAM8	MITF	FLNA	ZC3H12A	CBX4	ARAF	RBCK1	SIRT2	ARRB2	SMARCA4	IRS2	SNAI1	MUC1	MYD88	PLK2	PRELID1	BAG1	GAS6	BCL3	LILRB1	IER3	NFKBIA	C5AR1	NOTCH1	GPI	NTSR1	GPX1	SOCS3	NR4A2	GRINA	THBS1	TNFAIP3	HCK	CDKN1A	TPT1	HK1	CEBPB	HMOX1	NR4A1
GO:0080171	lytic vacuole organization	3.986e-06	0.02731	0.0002875	0.002705	12	56	ACP2	FAM160A2	RAB20	GAA	VPS11	HPS1	IDUA	PPT1	LAMTOR1	TFEB	RAB34	NAGPA
GO:0007040	lysosome organization	3.986e-06	0.02731	0.0002875	0.002705	12	56	ACP2	FAM160A2	RAB20	GAA	VPS11	HPS1	IDUA	PPT1	LAMTOR1	TFEB	RAB34	NAGPA
GO:0043300	regulation of leukocyte degranulation	4.031e-06	0.02762	0.0002877	0.002708	11	47	ABR	PRAM1	FES	FGR	UNC13D	STXBP2	HMOX1	PLD2	GAB2	LAMP1	LGALS9
GO:0001934	positive regulation of protein phosphorylation	4.144e-06	0.0284	0.0002927	0.002755	72	960	ERBB4	ACVRL1	ADAM8	MAP3K3	AXIN1	MAP3K11	CCL3	CCL11	MAD2L2	STK25	TRAF7	ADCY4	ZC3H12A	ZNF622	CAMK1	ARAF	ARRB2	PYCARD	MYD88	GADD45B	ATP6AP1	GAS6	GFRA2	STK11	BMP3	C5AR1	GNG3	RPS6KA4	SASH1	SOCS3	MAP3K6	TGFB1	UNC119	OSM	THBS1	CD4	TIAM1	NEURL1	AVPI1	RELT	PIK3R5	TPD52L1
GO:0050865	regulation of cell activation	4.429e-06	0.03035	0.0003086	0.002903	48	554	ABR	LILRB2	RPS6KA1	ADA	ADAM8	PRAM1	MAD1L1	FES	FGR	ZC3H12A	TNFSF13B	PYCARD	IRS2	DGAT1	MYD88	PRELID1	GAS6	UNC13D	LILRB1	VSIR	STXBP2	AP3D1	ICOSLG	ADRM1	TGFB1	THBS1	CD4	TNFAIP3	CDKN1A	CEBPB	VSIG4	PLA2G2F	HMOX1	SASH3	HPS1	PLD2	PIK3R6	CSK	PKN1	IL15RA	GAB2	JAK3
GO:0001816	cytokine production	4.458e-06	0.03055	0.0003086	0.002903	57	703	LILRB2	ADAM8	IRF9	CCL3	FGR	DDX41	STOML2	ZC3H12A	KAT5	APOA2	ARRB2	PYCARD	NLRP4	G6PD	MYD88	GAS6	BCL3	LILRB1	CRLF2	VSIR	CD300C	DTX4	C5AR1	NOTCH1	ICOSLG	RPS6KA4	TGFB1	THBS1	CD4	CD14	FURIN	TNFAIP3	PDE4B	CEBPB	UBE2L6	VSIG4	PER1	HMOX1	CUEDC2	SASH3	PIN1	HSF1
GO:0043434	response to peptide hormone	4.524e-06	0.031	0.00031	0.002917	41	443	TCIRG1	RXRA	RAB8A	ADM	FOXO4	ADCY4	IRS2	WDTC1	ATP6V0B	ATP6AP1	SREBF1	BSG	GNB2	GNG3	ADRM1	SOCS3	NR4A2	ATP6V1F	NR4A1	SERPINA1	PKM	PLD2	USF1	HSF1	POR	SOGA1	CSK	MAPK3	CTSB	SLC26A6	CYC1	INPPL1	JAK3	JUNB	JUND	PTPRE	RAB13	AGTRAP	NR4A3	EIF4EBP1	TRPV4
GO:0036003	positive regulation of transcription from RNA polymerase II promoter in response to stress	4.845e-06	0.03319	0.0003287	0.003093	8	24	ATF3	MUC1	NOTCH1	CEBPB	VEGFA	ATF6B	MAPK7	DDIT3
GO:0061515	myeloid cell development	5.141e-06	0.03522	0.0003453	0.003249	13	67	ERCC2	G6PD	ATP6AP1	SRF	LILRB1	JMJD6	NBEAL2	HBZ	TYROBP	ITGAM	FAM20C	TESC	LRRK1
GO:0070482	response to oxygen levels	5.344e-06	0.03662	0.0003555	0.003345	34	339	ERCC2	ACTN4	ADA	ADAM8	ADM	ALAD	ALOX5	FOSL2	SIRT2	MTHFR	SRF	USP19	NOTCH1	SOCS3	NR4A2	TGFB1	THBS1	NARFL	CDKN1A	HMBS	HMOX1	PKM	PLD2	USF1	PLOD1	VEGFA	DDIT4	ICAM1	CXCR4	AGTRAP	EGLN3	EIF4EBP1	CHCHD2	ENG
GO:0030155	regulation of cell adhesion	5.759e-06	0.03946	0.0003794	0.00357	57	709	LILRB2	ACTN4	ACVRL1	ADA	ADAM8	MAD1L1	FES	MAD2L2	PREX1	FLNA	SIPA1	TNFSF13B	PYCARD	MYO1F	MUC1	PRELID1	ADAM15	SRF	UNC13D	LILRB1	RCC2	VSIR	NINJ1	AP3D1	NOTCH1	ICOSLG	ADRM1	TFE3	TGFB1	THBS1	CD4	TNFAIP3	CEBPB	VSIG4	PLA2G2F	PLXNB2	SASH3	PLD2	VEGFA	ICAM1	PPP2R1A	PIK3R6
GO:0022603	regulation of anatomical structure morphogenesis	5.897e-06	0.04041	0.0003842	0.003615	81	1131	EPS8	ABR	MAP1B	TBC1D2	ACTN4	RRAS	ACVRL1	ADA	RXRA	ADM	AP2A1	FES	CCL3	FOXO4	CCL11	MAD2L2	FGR	ALDOA	PREX1	ARAP1	STK25	CARM1	FLNA	ZC3H12A	GAS7	CAMK1	LRRC4C	ARHGAP4	ARRB2	TNFSF13B	SNAI1	MYH9	TBC1D9B	TBC1D2B	SRF	UNC13D	PLXND1	RCC2	STK11	CYFIP1	TBC1D1	SGSM3
GO:0043207	response to external biotic stimulus	6e-06	0.04111	0.0003842	0.003615	73	988	ABR	C19orf66	SLC35C1	LILRB2	GMIP	ADM	IRF9	AP2A1	HIST1H3E	AP1B1	DEFB125	CCL3	ALAD	CCL11	FGR	DDX41	ZC3H12A	FOS	SBNO2	SIRT2	PYCARD	MYO1F	MYD88	DEFB118	UNC13D	BCL3	LILRB1	IER3	NFKBIA	NFKBIB	AP1M1	C5AR1	NOTCH1	SASH1	GPX1	SOCS3	CXCL2	COTL1	TGFB1	MTA1	CD4	CD14
GO:0051707	response to other organism	6e-06	0.04111	0.0003842	0.003615	73	988	ABR	C19orf66	SLC35C1	LILRB2	GMIP	ADM	IRF9	AP2A1	HIST1H3E	AP1B1	DEFB125	CCL3	ALAD	CCL11	FGR	DDX41	ZC3H12A	FOS	SBNO2	SIRT2	PYCARD	MYO1F	MYD88	DEFB118	UNC13D	BCL3	LILRB1	IER3	NFKBIA	NFKBIB	AP1M1	C5AR1	NOTCH1	SASH1	GPX1	SOCS3	CXCL2	COTL1	TGFB1	MTA1	CD4	CD14
GO:0022604	regulation of cell morphogenesis	6.132e-06	0.04202	0.000389	0.003661	51	610	EPS8	MAP1B	TBC1D2	ACTN4	FES	CCL3	CCL11	MAD2L2	FGR	ALDOA	PREX1	ARAP1	STK25	FLNA	GAS7	LRRC4C	ARHGAP4	SNAI1	MYH9	TBC1D9B	TBC1D2B	SRF	UNC13D	PLXND1	RCC2	STK11	CYFIP1	TBC1D1	SGSM3	SEMA4A	NOTCH1	TGFB1	TIAM1	HCK	LPAR3	TWF2	PLXNB2	SSH1	GORASP1	PLXNA2	VEGFA	ICAM1
GO:0071900	regulation of protein serine/threonine kinase activity	6.412e-06	0.04394	0.0004031	0.003793	45	513	SPRED2	ADAM8	MAP3K3	AXIN1	MAP3K11	FEM1A	TRAF7	CAMK1	ARAF	PYCARD	GADD45B	STK11	C5AR1	GNG3	SASH1	GPS1	MAP3K6	TGFB1	THBS1	TIAM1	AVPI1	TNFAIP3	PIK3R5	TPD52L1	CDKN1A	LPAR3	PIM1	VEGFA	H2AFY	PPP2R1A	CSF1R	PIK3R6	CSK	PKN1	MAPK3	MAPK7	MAP2K2	MAP2K3	MAP2K7	ILK	INPPL1	CXCR4
GO:0001666	response to hypoxia	6.759e-06	0.04631	0.000421	0.003962	32	313	ERCC2	ACTN4	ADA	ADAM8	ADM	ALAD	FOSL2	SIRT2	MTHFR	SRF	USP19	NOTCH1	SOCS3	NR4A2	TGFB1	THBS1	NARFL	HMBS	HMOX1	PKM	PLD2	USF1	PLOD1	VEGFA	DDIT4	ICAM1	CXCR4	AGTRAP	EGLN3	EIF4EBP1	CHCHD2	ENG
GO:0006954	inflammatory response	7.105e-06	0.04868	0.0004386	0.004127	57	714	PIK3AP1	ABR	ADA	ADAM8	RXRA	CCL3	CCL11	CLEC10A	FEM1A	ALOX5	ZC3H12A	FOS	APOA2	SBNO2	PYCARD	NLRP4	MYD88	SIGLEC9	UNC13D	CRLF2	IER3	C5AR1	NOTCH1	RPS6KA4	GPX1	SOCS3	NFKBIZ	CXCL2	TGFB1	OSM	THBS1	MTA1	P2RX1	CD14	TNFAIP3	RELT	HCK	CEBPB	PER1	CFP	HMOX1	SERPINA1
[truncated: 111 more columns]

## Sheet: Table S6 (Immune gene sets)
Table S6
immune response	leukocyte activation	myeloid cell activation involved in immune response	hematopoietic or lymphoid organ development	leukocyte degranulation	leukocyte activation involved in immune response	cell activation involved in immune response	regulation of immune system process	immune system development	myeloid cell differentiation	immune effector process	leukocyte differentiation	myeloid leukocyte activation	regulation of immune response	myeloid leukocyte mediated immunity	lymphocyte activation	myeloid leukocyte differentiation	regulation of leukocyte activation	leukocyte mediated immunity	regulation of leukocyte degranulation	myeloid cell development	SUM
LGALS9	LGALS9	LGALS9	LGALS9	LGALS9	LGALS9	LGALS9	LGALS9	LGALS9	LGALS9	LGALS9	LGALS9	LGALS9	LGALS9	LGALS9	LGALS9	LGALS9	LGALS9	LGALS9	LGALS9		20
GAB2	GAB2	GAB2	GAB2	GAB2	GAB2	GAB2	GAB2	GAB2	GAB2	GAB2	GAB2	GAB2	GAB2	GAB2		GAB2	GAB2	GAB2	GAB2		19
FES	FES	FES	FES	FES	FES	FES	FES	FES	FES	FES		FES	FES	FES			FES	FES	FES		17
CCL3	CCL3	CCL3	CCL3	CCL3	CCL3	CCL3	CCL3	CCL3	CCL3	CCL3	CCL3	CCL3		CCL3		CCL3		CCL3			16
LILRB1	LILRB1		LILRB1		LILRB1	LILRB1	LILRB1	LILRB1	LILRB1	LILRB1	LILRB1		LILRB1		LILRB1	LILRB1	LILRB1	LILRB1		LILRB1	16
TGFB1	TGFB1		TGFB1		TGFB1	TGFB1	TGFB1	TGFB1	TGFB1	TGFB1	TGFB1	TGFB1	TGFB1		TGFB1	TGFB1	TGFB1	TGFB1			16
TYROBP	TYROBP	TYROBP	TYROBP		TYROBP	TYROBP	TYROBP	TYROBP	TYROBP	TYROBP	TYROBP	TYROBP	TYROBP			TYROBP				TYROBP	15
UNC13D	UNC13D	UNC13D		UNC13D	UNC13D	UNC13D	UNC13D			UNC13D		UNC13D	UNC13D	UNC13D	UNC13D		UNC13D	UNC13D	UNC13D		15
ABR	ABR	ABR		ABR	ABR	ABR	ABR			ABR		ABR	ABR	ABR			ABR	ABR	ABR		14
FGR	FGR	FGR		FGR	FGR	FGR	FGR			FGR		FGR	FGR	FGR			FGR	FGR	FGR		14
HMOX1	HMOX1	HMOX1		HMOX1	HMOX1	HMOX1	HMOX1			HMOX1		HMOX1	HMOX1	HMOX1			HMOX1	HMOX1	HMOX1		14
PLD2	PLD2	PLD2		PLD2	PLD2	PLD2	PLD2			PLD2		PLD2	PLD2	PLD2			PLD2	PLD2	PLD2		14
PRAM1	PRAM1	PRAM1		PRAM1	PRAM1	PRAM1	PRAM1			PRAM1		PRAM1	PRAM1	PRAM1			PRAM1	PRAM1	PRAM1		14
RARA	RARA		RARA		RARA	RARA	RARA	RARA	RARA	RARA	RARA		RARA		RARA	RARA	RARA				14
STXBP2	STXBP2	STXBP2		STXBP2	STXBP2	STXBP2	STXBP2			STXBP2		STXBP2	STXBP2	STXBP2			STXBP2	STXBP2	STXBP2		14
JAK3	JAK3		JAK3		JAK3	JAK3	JAK3	JAK3		JAK3	JAK3		JAK3		JAK3		JAK3	JAK3			13
LAT2	LAT2	LAT2		LAT2	LAT2	LAT2	LAT2			LAT2		LAT2	LAT2	LAT2	LAT2			LAT2			13
NR4A3	NR4A3	NR4A3		NR4A3	NR4A3	NR4A3	NR4A3			NR4A3		NR4A3	NR4A3	NR4A3			NR4A3	NR4A3			13
ADA	ADA		ADA		ADA	ADA	ADA	ADA		ADA	ADA		ADA		ADA		ADA				12
LAMP1	LAMP1			LAMP1	LAMP1	LAMP1	LAMP1			LAMP1			LAMP1		LAMP1		LAMP1	LAMP1	LAMP1		12
MYO1F	MYO1F	MYO1F		MYO1F	MYO1F	MYO1F	MYO1F			MYO1F		MYO1F	MYO1F	MYO1F				MYO1F			12
SBNO2	SBNO2	SBNO2	SBNO2		SBNO2	SBNO2		SBNO2	SBNO2	SBNO2	SBNO2	SBNO2				SBNO2					12
TNFAIP3	TNFAIP3		TNFAIP3		TNFAIP3	TNFAIP3	TNFAIP3	TNFAIP3		TNFAIP3	TNFAIP3		TNFAIP3		TNFAIP3		TNFAIP3				12
ADAM8	ADAM8		ADAM8				ADAM8	ADAM8	ADAM8		ADAM8		ADAM8		ADAM8	ADAM8	ADAM8				11
CEBPB	CEBPB		CEBPB				CEBPB	CEBPB	CEBPB	CEBPB	CEBPB				CEBPB	CEBPB	CEBPB				11
DLL1	DLL1		DLL1		DLL1	DLL1	DLL1	DLL1	DLL1	DLL1	DLL1				DLL1						11
ITGAM	ITGAM		ITGAM				ITGAM	ITGAM	ITGAM		ITGAM		ITGAM		ITGAM	ITGAM				ITGAM	11
LGALS1	LGALS1		LGALS1		LGALS1	LGALS1	LGALS1	LGALS1		LGALS1	LGALS1				LGALS1		LGALS1				11
PIK3R6	PIK3R6		PIK3R6				PIK3R6	PIK3R6		PIK3R6	PIK3R6		PIK3R6		PIK3R6		PIK3R6	PIK3R6			11
PYCARD	PYCARD	PYCARD			PYCARD	PYCARD	PYCARD			PYCARD		PYCARD	PYCARD		PYCARD		PYCARD				11
SASH3	SASH3		SASH3				SASH3	SASH3		SASH3	SASH3		SASH3		SASH3		SASH3	SASH3			11
STX11	STX11	STX11		STX11	STX11	STX11				STX11		STX11		STX11	STX11			STX11			11
BCL3	BCL3		BCL3		BCL3	BCL3		BCL3		BCL3	BCL3				BCL3			BCL3			10
CD4	CD4		CD4				CD4	CD4		CD4	CD4		CD4		CD4		CD4				10
ICOSLG	ICOSLG				ICOSLG	ICOSLG	ICOSLG	ICOSLG		ICOSLG					ICOSLG		ICOSLG	ICOSLG			10
IRF7			IRF7				IRF7	IRF7	IRF7	IRF7	IRF7		IRF7			IRF7		IRF7			10
PI4K2A	PI4K2A	PI4K2A		PI4K2A	PI4K2A	PI4K2A				PI4K2A		PI4K2A		PI4K2A				PI4K2A			10
ERCC1	ERCC1		ERCC1		ERCC1	ERCC1		ERCC1		ERCC1					ERCC1			ERCC1			9
ICAM1	ICAM1				ICAM1	ICAM1	ICAM1			ICAM1			ICAM1		ICAM1			ICAM1			9
LILRB2	LILRB2		LILRB2				LILRB2	LILRB2			LILRB2		LILRB2		LILRB2		LILRB2				9
PKN1	PKN1		PKN1				PKN1	PKN1		PKN1			PKN1		PKN1		PKN1				9
SEMA4A	SEMA4A		SEMA4A		SEMA4A	SEMA4A		SEMA4A		SEMA4A	SEMA4A				SEMA4A						9
FOS			FOS				FOS	FOS	FOS		FOS		FOS			FOS					8
GAS6	GAS6		GAS6				GAS6	GAS6			GAS6				GAS6		GAS6				8
MYD88	MYD88						MYD88			MYD88			MYD88		MYD88		MYD88	MYD88			8
POU2F2	POU2F2		POU2F2					POU2F2		POU2F2	POU2F2				POU2F2			POU2F2			8
PRELID1	PRELID1		PRELID1				PRELID1	PRELID1			PRELID1				PRELID1		PRELID1				8
STK11	STK11		STK11				STK11	STK11			STK11		STK11		STK11						8
VSIR	VSIR						VSIR			VSIR			VSIR		VSIR		VSIR	VSIR			8
CSF1R			CSF1R				CSF1R	CSF1R	CSF1R		CSF1R					CSF1R					7
CXCL2			CXCL2				CXCL2	CXCL2		CXCL2				CXCL2				CXCL2			7
LILRB4			LILRB4				LILRB4	LILRB4	LILRB4		LILRB4					LILRB4					7
TFE3			TFE3				TFE3	TFE3	TFE3		TFE3					TFE3					7
VEGFA			VEGFA				VEGFA	VEGFA	VEGFA		VEGFA					VEGFA					7
VSIG4	VSIG4						VSIG4			VSIG4			VSIG4		VSIG4		VSIG4				7
WAS	WAS						WAS			WAS			WAS		WAS			WAS			7
CSK	CSK						CSK						CSK		CSK		CSK				6
MAPK3			MAPK3				MAPK3	MAPK3		MAPK3			MAPK3								6
NFKBIA			NFKBIA				NFKBIA	NFKBIA	NFKBIA				NFKBIA								6
TNFSF13B	TNFSF13B						TNFSF13B						TNFSF13B		TNFSF13B		TNFSF13B				6
ARRB2							ARRB2			ARRB2			ARRB2					ARRB2			5
HCK				HCK			HCK			HCK			HCK								5
ITGB2	ITGB2						ITGB2						ITGB2		ITGB2						5
MYO1G							MYO1G			MYO1G			MYO1G					MYO1G			5
STOML2	STOML2						STOML2						STOML2		STOML2						5
THBS1	THBS1						THBS1					THBS1					THBS1				5
APOA2							APOA2			APOA2			APOA2								4
C5AR1							C5AR1			C5AR1			C5AR1								4
CFP							CFP			CFP			CFP								4
CUEDC2							CUEDC2			CUEDC2			CUEDC2								4
CYFIP1							CYFIP1			CYFIP1			CYFIP1								4
LIMK1							LIMK1			LIMK1			LIMK1								4
NOTCH1			NOTCH1				NOTCH1	NOTCH1													4
CD14							CD14						CD14								3
CD300C							CD300C						CD300C								3
CD300E							CD300E						CD300E								3
CRLF2										CRLF2								CRLF2			3
CTSB							CTSB						CTSB								3
GPX1							GPX1						GPX1								3
LAIR1							LAIR1						LAIR1								3
MAP2K7							MAP2K7						MAP2K7								3
MAPKAPK3							MAPKAPK3						MAPKAPK3								3
NR1H2							NR1H2						NR1H2								3
OSCAR							OSCAR						OSCAR								3
PDE4B							PDE4B						PDE4B								3
PIK3AP1							PIK3AP1						PIK3AP1								3
PSMB3							PSMB3						PSMB3								3
PSMC4							PSMC4						PSMC4								3
PSMD3							PSMD3						PSMD3								3
RBCK1							RBCK1						RBCK1								3
SIGLEC9							SIGLEC9						SIGLEC9								3
SOCS3							SOCS3						SOCS3								3
THEMIS2							THEMIS2						THEMIS2								3
TUBB4B										TUBB4B								TUBB4B			3
TYK2							TYK2						TYK2								3
C19orf66										C19orf66											2
IRF5										IRF5											2
IRF9										IRF9											2
ADAM15																					1
ADM																					1
CCL11																					1
CLEC10A																					1
DEFB118																					1
DEFB125																					1
GPI																					1
GSDMD																					1
KAAG1																					1
ORAI1																					1
OSM																					1
OTUB1																					1
RELT																					1
RGS1																					1
SECTM1																					1
SIGLEC16																					1
SIRT2																					1
SLC26A6																					1
TFEB																					1
TRIM8																					1

## Sheet: Table S7 (Gene Sets AML 06)
Table S6
ID	Name	p-value	q-value Bonferroni	q-value FDR B&H	q-value FDR B&Y	Hit Count in Query List	Hit Count in Genome	Hit in Query List
GO:0002682	regulation of immune system process	1.37e-13	5.872e-10	5.872e-10	5.25e-09	56	1514	CDKN1A,CEBPB,SPI1,SIGLEC9,VSIG4,OSCAR,CFP,ITGAM,LILRB1,VSIR,GAB2,CD300C,TYROBP,PRAM1,CYFIP1,STXBP2,PTPRE,AP2A1,HIST1H3E,HIST1H4D,PIM1,NFKBIA,MITF,FES,CCL3,MAFB,TESC,C5AR1,PLD2,FGR,LILRB4,VEGFA,THEMIS2,LAT2,FOS,ICAM1,GPX1,SOCS3,NR4A3,APOA2,DLL1,CXCL2,ZFP36,TFE3,LIMK1,THBS1,ARRB2,CSF1R,KLF10,PIK3R6,CD14,TNFSF13B,IRS2,CTSB,CD300E,HCK
GO:0006955	immune response	9.251e-11	3.965e-07	1.949e-07	1.743e-06	52	1577	CEBPB,SIGLEC9,ADAM15,VSIG4,OSCAR,CFP,IRF5,BCL3,ITGAM,LILRB1,VSIR,GAB2,CD300C,ADM,TYROBP,PRAM1,CYFIP1,STXBP2,NFKBIA,FES,CCL3,C5AR1,PLD2,SEMA4A,FGR,CLEC10A,LILRB4,SECTM1,VEGFA,THEMIS2,LAT2,FOS,ICAM1,GPX1,SOCS3,NR4A3,APOA2,DLL1,CXCL2,RGS1,TFE3,LIMK1,THBS1,ARRB2,CSF1R,PIK3R6,CD14,TNFSF13B,CTSB,STX11,CD300E,HCK
GO:0045637	regulation of myeloid cell differentiation	1.364e-10	5.847e-07	1.949e-07	1.743e-06	18	206	CEBPB,SPI1,LILRB1,TYROBP,HIST1H4D,NFKBIA,MITF,FES,CCL3,MAFB,TESC,LILRB4,FOS,DLL1,ZFP36,TFE3,CSF1R,KLF10
GO:0030316	osteoclast differentiation	4.514e-10	1.935e-06	4.837e-07	4.324e-06	13	101	CEBPB,LILRB1,GAB2,TYROBP,MITF,CCL3,MAFB,LILRB4,FOS,LRRK1,TFE3,CSF1R,KLF10
GO:0030099	myeloid cell differentiation	9.123e-10	3.91e-06	7.82e-07	6.991e-06	23	389	RASGRP4,CEBPB,SPI1,ITGAM,LILRB1,GAB2,TYROBP,HIST1H4D,NFKBIA,MITF,FES,CCL3,MAFB,TESC,LILRB4,VEGFA,FOS,LRRK1,DLL1,ZFP36,TFE3,CSF1R,KLF10
GO:0045670	regulation of osteoclast differentiation	1.828e-09	7.836e-06	1.172e-06	1.048e-05	11	73	CEBPB,LILRB1,TYROBP,MITF,CCL3,MAFB,LILRB4,FOS,TFE3,CSF1R,KLF10
GO:0002573	myeloid leukocyte differentiation	2.107e-09	9.032e-06	1.172e-06	1.048e-05	17	215	CEBPB,SPI1,ITGAM,LILRB1,GAB2,TYROBP,MITF,CCL3,MAFB,TESC,LILRB4,VEGFA,FOS,LRRK1,TFE3,CSF1R,KLF10
GO:1903706	regulation of hemopoiesis	2.258e-09	9.676e-06	1.172e-06	1.048e-05	22	373	CEBPB,SPI1,LILRB1,TYROBP,HIST1H4D,PIM1,NFKBIA,MITF,FES,CCL3,MAFB,TESC,LILRB4,VEGFA,FOS,DLL1,CXCL2,ZFP36,TFE3,CSF1R,KLF10,PIK3R6
GO:0043299	leukocyte degranulation	2.462e-09	1.055e-05	1.172e-06	1.048e-05	11	75	GAB2,PRAM1,STXBP2,FES,CCL3,PLD2,FGR,LAT2,NR4A3,STX11,HCK
GO:0042981	regulation of apoptotic process	3.103e-09	1.33e-05	1.328e-06	1.187e-05	48	1532	CDKN1A,TPT1,PLK2,HIP1,HK1,CEBPB,BAG1,DAP,SIK1,IRF5,BCL3,ITGA5,ARHGEF11,LILRB1,RXRA,ADM,BMP3,IER3,PIM1,NFKBIA,MITF,CCL3,PLAUR,C5AR1,FKBP8,ADAMTSL4,VEGFA,DUSP1,G0S2,ICAM1,GPX1,SOCS3,NR4A2,NR4A3,FAM129B,GRINA,DLL1,THBS1,ARRB2,CSF1R,P2RX1,PPT1,NACC2,ITPRIP,IRS2,CTSB,HCK,TPD52L1
GO:0012501	programmed cell death	3.407e-09	1.46e-05	1.328e-06	1.187e-05	56	1963	CDKN1A,RNF144B,TPT1,PLK2,HIP1,HK1,CEBPB,SPI1,ADAM15,BAG1,DAP,SIK1,IRF5,BCL3,ITGA5,ARHGEF11,LILRB1,GRAMD4,RXRA,ADM,BMP3,IER3,PIM1,NFKBIA,MITF,PKM,MFN2,CCL3,PLAUR,C5AR1,FKBP8,ADAMTSL4,VEGFA,DUSP1,G0S2,ICAM1,GPX1,SOCS3,NR4A2,NR4A3,FAM129B,GRINA,DLL1,THBS1,ARRB2,CSF1R,P2RX1,CD14,FAM32A,PPT1,NACC2,ITPRIP,IRS2,CTSB,HCK,TPD52L1
GO:0043067	regulation of programmed cell death	4.433e-09	1.9e-05	1.583e-06	1.416e-05	48	1549	CDKN1A,TPT1,PLK2,HIP1,HK1,CEBPB,BAG1,DAP,SIK1,IRF5,BCL3,ITGA5,ARHGEF11,LILRB1,RXRA,ADM,BMP3,IER3,PIM1,NFKBIA,MITF,CCL3,PLAUR,C5AR1,FKBP8,ADAMTSL4,VEGFA,DUSP1,G0S2,ICAM1,GPX1,SOCS3,NR4A2,NR4A3,FAM129B,GRINA,DLL1,THBS1,ARRB2,CSF1R,P2RX1,PPT1,NACC2,ITPRIP,IRS2,CTSB,HCK,TPD52L1
GO:0006915	apoptotic process	5.483e-09	2.35e-05	1.745e-06	1.56e-05	55	1934	CDKN1A,RNF144B,TPT1,PLK2,HIP1,HK1,CEBPB,SPI1,ADAM15,BAG1,DAP,SIK1,IRF5,BCL3,ITGA5,ARHGEF11,LILRB1,GRAMD4,RXRA,ADM,BMP3,IER3,PIM1,NFKBIA,MITF,MFN2,CCL3,PLAUR,C5AR1,FKBP8,ADAMTSL4,VEGFA,DUSP1,G0S2,ICAM1,GPX1,SOCS3,NR4A2,NR4A3,FAM129B,GRINA,DLL1,THBS1,ARRB2,CSF1R,P2RX1,CD14,FAM32A,PPT1,NACC2,ITPRIP,IRS2,CTSB,HCK,TPD52L1
GO:0002275	myeloid cell activation involved in immune response	5.701e-09	2.444e-05	1.745e-06	1.56e-05	11	81	GAB2,TYROBP,PRAM1,STXBP2,FES,CCL3,PLD2,FGR,LAT2,NR4A3,STX11
GO:0050776	regulation of immune response	1.095e-08	4.695e-05	3.13e-06	2.798e-05	34	902	SIGLEC9,VSIG4,OSCAR,CFP,ITGAM,LILRB1,VSIR,GAB2,CD300C,TYROBP,PRAM1,CYFIP1,STXBP2,NFKBIA,FES,C5AR1,PLD2,FGR,THEMIS2,LAT2,FOS,ICAM1,GPX1,SOCS3,NR4A3,APOA2,LIMK1,ARRB2,PIK3R6,CD14,TNFSF13B,CTSB,CD300E,HCK
GO:1901700	response to oxygen-containing compound	1.673e-08	7.17e-05	4.482e-06	4.007e-05	48	1615	CDKN1A,ATP6V0B,CEBPB,SPI1,INPPL1,PER1,HMBS,IRF5,LILRB1,PTGIR,RXRA,ADM,SERPINA1,PTPRE,BSG,PIM1,NFKBIA,GLUL,PKM,CCL3,FOXO4,TESC,C5AR1,PLD2,LAMTOR1,GNG3,DAGLA,RAB13,DPYSL2,COMT,FOS,DUSP1,FOSL2,ICAM1,GPX1,SOCS3,NR4A2,NR4A3,APOA2,GRN,CXCL2,THBS1,KLF10,P2RX1,CD14,IRS2,CTSB,HCK
GO:0016192	vesicle-mediated transport	1.98e-08	8.485e-05	4.991e-06	4.462e-05	46	1518	HIP1,PDLIM7,SIGLEC9,INPPL1,MARCH2,TBC1D2,NAPA,DYSF,LILRB1,GAB2,ADM,QSOX1,PRAM1,SERPINA1,CYFIP1,STXBP2,AP2A1,OSBPL5,FES,CCL3,PLD2,FGR,CLEC10A,RAB13,VEGFA,DPYSL2,LAT2,TOM1,NR4A3,GRN,SNX33,RAB20,DLL1,LIMK1,THBS1,UBE2O,ARRB2,P2RX1,CD14,PPT1,ASGR2,TNFAIP2,STX11,HCK,PLIN3,PACSIN2
GO:0002444	myeloid leukocyte mediated immunity	2.51e-08	0.0001076	5.977e-06	5.344e-05	11	93	GAB2,PRAM1,STXBP2,FES,CCL3,PLD2,FGR,LAT2,NR4A3,CXCL2,STX11
GO:0006954	inflammatory response	2.975e-08	0.0001275	6.711e-06	6e-05	29	714	CEBPB,SIGLEC9,PER1,CFP,ITGAM,RXRA,SERPINA1,IER3,CCL3,C5AR1,CLEC10A,ALOX5,THEMIS2,RPS6KA4,FOS,ICAM1,GPX1,SOCS3,NFKBIZ,APOA2,CXCL2,ZFP36,THBS1,CSF1R,IGFBP4,P2RX1,CD14,MAP2K3,HCK
GO:0006952	defense response	3.589e-08	0.0001538	7.691e-06	6.876e-05	48	1655	CEBPB,SIGLEC9,ADAM15,VSIG4,PER1,CFP,IRF5,BCL3,ITGAM,ITGAX,LILRB1,RXRA,CD300C,ADM,TYROBP,SERPINA1,AP2A1,HIST1H3E,IER3,NFKBIA,FES,CCL3,C5AR1,FGR,CLEC10A,ALOX5,THEMIS2,RPS6KA4,FOS,ICAM1,GPX1,SOCS3,NFKBIZ,APOA2,CXCL2,ZFP36,THBS1,ARRB2,CSF1R,IGFBP4,P2RX1,PIK3R6,CD14,CTSB,STX11,MAP2K3,CD300E,HCK
GO:0002252	immune effector process	3.769e-08	0.0001616	7.693e-06	6.878e-05	32	856	CEBPB,VSIG4,CFP,IRF5,BCL3,ITGAX,LILRB1,VSIR,GAB2,TYROBP,PRAM1,CYFIP1,STXBP2,AP2A1,HIST1H3E,FES,CCL3,C5AR1,PLD2,SEMA4A,FGR,LAT2,ICAM1,NR4A3,APOA2,DLL1,CXCL2,LIMK1,ARRB2,PIK3R6,STX11,HCK
GO:0010941	regulation of cell death	4.166e-08	0.0001786	8.116e-06	7.256e-05	48	1663	CDKN1A,TPT1,PLK2,HIP1,HK1,CEBPB,BAG1,DAP,SIK1,IRF5,BCL3,ITGA5,ARHGEF11,LILRB1,RXRA,ADM,BMP3,IER3,PIM1,NFKBIA,MITF,CCL3,PLAUR,C5AR1,FKBP8,ADAMTSL4,VEGFA,DUSP1,G0S2,ICAM1,GPX1,SOCS3,NR4A2,NR4A3,FAM129B,GRINA,DLL1,THBS1,ARRB2,CSF1R,P2RX1,PPT1,NACC2,ITPRIP,IRS2,CTSB,HCK,TPD52L1
GO:0043066	negative regulation of apoptotic process	5.145e-08	0.0002205	9.587e-06	8.571e-05	33	914	CDKN1A,TPT1,PLK2,HK1,CEBPB,BAG1,BCL3,ITGA5,LILRB1,IER3,PIM1,NFKBIA,MITF,PLAUR,C5AR1,FKBP8,VEGFA,DUSP1,ICAM1,GPX1,SOCS3,NR4A2,NR4A3,FAM129B,GRINA,DLL1,THBS1,ARRB2,CSF1R,PPT1,ITPRIP,IRS2,HCK
GO:0002366	leukocyte activation involved in immune response	5.59e-08	0.0002396	9.672e-06	8.647e-05	16	236	BCL3,LILRB1,GAB2,TYROBP,PRAM1,STXBP2,FES,CCL3,PLD2,SEMA4A,FGR,LAT2,ICAM1,NR4A3,DLL1,STX11
GO:0002761	regulation of myeloid leukocyte differentiation	5.642e-08	0.0002418	9.672e-06	8.647e-05	12	124	CEBPB,LILRB1,TYROBP,MITF,CCL3,MAFB,TESC,LILRB4,FOS,TFE3,CSF1R,KLF10
GO:0002263	cell activation involved in immune response	6.285e-08	0.0002694	1.036e-05	9.263e-05	16	238	BCL3,LILRB1,GAB2,TYROBP,PRAM1,STXBP2,FES,CCL3,PLD2,SEMA4A,FGR,LAT2,ICAM1,NR4A3,DLL1,STX11
GO:0043069	negative regulation of programmed cell death	7.35e-08	0.000315	1.167e-05	0.0001043	33	928	CDKN1A,TPT1,PLK2,HK1,CEBPB,BAG1,BCL3,ITGA5,LILRB1,IER3,PIM1,NFKBIA,MITF,PLAUR,C5AR1,FKBP8,VEGFA,DUSP1,ICAM1,GPX1,SOCS3,NR4A2,NR4A3,FAM129B,GRINA,DLL1,THBS1,ARRB2,CSF1R,PPT1,ITPRIP,IRS2,HCK
GO:0006897	endocytosis	9.926e-08	0.0004254	1.473e-05	0.0001317	27	667	HIP1,PDLIM7,SIGLEC9,INPPL1,MARCH2,LILRB1,ADM,CYFIP1,AP2A1,PLD2,FGR,CLEC10A,VEGFA,DPYSL2,TOM1,GRN,SNX33,RAB20,DLL1,LIMK1,THBS1,ARRB2,CD14,PPT1,ASGR2,HCK,PACSIN2
GO:0002274	myeloid leukocyte activation	9.965e-08	0.0004271	1.473e-05	0.0001317	14	185	SPI1,GAB2,TYROBP,PRAM1,STXBP2,PTPRE,FES,CCL3,PLD2,FGR,LAT2,NR4A3,THBS1,STX11
GO:0010243	response to organonitrogen compound	1.691e-07	0.000725	2.372e-05	0.0002121	31	867	CDKN1A,ATP6V0B,CEBPB,INPPL1,PER1,HMBS,IRF5,RXRA,ADM,SERPINA1,PTPRE,BSG,NFKBIA,PKM,FOXO4,C5AR1,PLD2,LAMTOR1,GNG3,RAB13,DPYSL2,FOS,DUSP1,ICAM1,SOCS3,NR4A2,NR4A3,KLF10,P2RX1,IRS2,CTSB
GO:0060548	negative regulation of cell death	1.716e-07	0.0007354	2.372e-05	0.0002121	34	1011	CDKN1A,TPT1,PLK2,HK1,CEBPB,BAG1,BCL3,ITGA5,LILRB1,IER3,PIM1,NFKBIA,MITF,PLAUR,C5AR1,FKBP8,VEGFA,DUSP1,ICAM1,GPX1,SOCS3,NR4A2,NR4A3,FAM129B,GRINA,DLL1,THBS1,ARRB2,CSF1R,PPT1,ITPRIP,IRS2,CTSB,HCK
GO:0002684	positive regulation of immune system process	2.585e-07	0.001108	3.463e-05	0.0003096	33	980	CDKN1A,VSIG4,CFP,ITGAM,LILRB1,GAB2,CYFIP1,STXBP2,NFKBIA,FES,CCL3,TESC,C5AR1,PLD2,FGR,VEGFA,THEMIS2,LAT2,FOS,ICAM1,NR4A3,CXCL2,LIMK1,THBS1,ARRB2,CSF1R,KLF10,PIK3R6,CD14,TNFSF13B,IRS2,CTSB,HCK
GO:0030097	hemopoiesis	4.377e-07	0.001876	5.684e-05	0.0005082	30	858	RASGRP4,CEBPB,CEBPD,SPI1,BCL3,ITGAM,LILRB1,GAB2,TYROBP,HIST1H4D,PIM1,NFKBIA,MITF,FES,CCL3,MAFB,TESC,SEMA4A,LILRB4,VEGFA,FOS,LRRK1,DLL1,CXCL2,ZFP36,TFE3,TTC7A,CSF1R,KLF10,PIK3R6
GO:0045055	regulated exocytosis	5.878e-07	0.002519	7.409e-05	0.0006624	17	316	NAPA,GAB2,QSOX1,PRAM1,SERPINA1,STXBP2,FES,CCL3,PLD2,FGR,VEGFA,LAT2,NR4A3,THBS1,P2RX1,STX11,HCK
GO:0045321	leukocyte activation	7.572e-07	0.003245	9.273e-05	0.000829	29	833	CDKN1A,CEBPB,SPI1,VSIG4,BCL3,ITGAM,ITGAX,LILRB1,VSIR,GAB2,TYROBP,PRAM1,STXBP2,PTPRE,FES,CCL3,MAFB,PLD2,SEMA4A,FGR,LAT2,ICAM1,NR4A3,DLL1,THBS1,PIK3R6,TNFSF13B,IRS2,STX11
GO:1901698	response to nitrogen compound	8.211e-07	0.003519	9.607e-05	0.0008589	32	982	CDKN1A,ATP6V0B,CEBPB,INPPL1,PER1,HMBS,IRF5,RXRA,ADM,SERPINA1,PTPRE,BSG,NFKBIA,PKM,FOXO4,C5AR1,PLD2,LAMTOR1,GNG3,RAB13,DPYSL2,FOS,DUSP1,ICAM1,SOCS3,NR4A2,NR4A3,THBS1,KLF10,P2RX1,IRS2,CTSB
GO:0032418	lysosome localization	8.293e-07	0.003555	9.607e-05	0.0008589	8	60	GAB2,STXBP2,FES,PLD2,LAMTOR1,FGR,LAT2,NR4A3
GO:0048534	hematopoietic or lymphoid organ development	1.323e-06	0.005672	0.0001493	0.001334	30	905	RASGRP4,CEBPB,CEBPD,SPI1,BCL3,ITGAM,LILRB1,GAB2,TYROBP,HIST1H4D,PIM1,NFKBIA,MITF,FES,CCL3,MAFB,TESC,SEMA4A,LILRB4,VEGFA,FOS,LRRK1,DLL1,CXCL2,ZFP36,TFE3,TTC7A,CSF1R,KLF10,PIK3R6
GO:0033003	regulation of mast cell activation	1.405e-06	0.006022	0.0001544	0.00138	7	45	GAB2,STXBP2,PTPRE,FES,PLD2,FGR,NR4A3
GO:0031099	regeneration	1.816e-06	0.007783	0.0001946	0.00174	13	202	CDKN1A,CEBPB,ADAM15,HMBS,RXRA,ADM,PKM,NINJ1,C5AR1,GPX1,SOCS3,NR4A3,APOA2
GO:0031100	animal organ regeneration	2.023e-06	0.00867	0.0002115	0.001891	9	90	CDKN1A,CEBPB,HMBS,ADM,PKM,C5AR1,SOCS3,NR4A3,APOA2
GO:0009719	response to endogenous stimulus	2.667e-06	0.01143	0.0002722	0.002433	45	1743	CDKN1A,WBP2,ATP6V0B,CEBPB,SPRED2,INPPL1,PER1,HMBS,SIK1,IRF5,RXRA,VSIR,ADM,BMP3,SERPINA1,PTPRE,BSG,NFKBIA,PKM,FOXO4,C5AR1,FKBP8,PLD2,LAMTOR1,GNG3,RAB13,DPYSL2,FOS,DUSP1,FOSL2,ICAM1,SOCS3,NR4A2,NR4A3,APOA2,GRN,THBS1,UBE2O,ARRB2,KLF10,P2RX1,FURIN,ZFHX3,IRS2,CTSB
GO:0045576	mast cell activation	2.746e-06	0.01177	0.0002731	0.002442	8	70	GAB2,STXBP2,PTPRE,FES,PLD2,FGR,LAT2,NR4A3
GO:0008360	regulation of cell shape	2.864e-06	0.01228	0.0002731	0.002442	11	148	PLXNB2,CYFIP1,FES,CCL3,SEMA4A,FGR,VEGFA,ICAM1,GAS7,CSF1R,HCK
GO:0032940	secretion by cell	2.882e-06	0.01235	0.0002731	0.002442	33	1093	NAPA,LILRB1,GAB2,CD300C,ADM,SLC38A2,QSOX1,PRAM1,SERPINA1,STXBP2,GLUL,FES,CCL3,PLD2,FGR,RAB13,VEGFA,DPYSL2,LAT2,NR4A3,APOA2,PNKD,THBS1,CSF1R,P2RX1,CD14,PPT1,TNFSF13B,FURIN,IRS2,TNFAIP2,STX11,HCK
GO:0002886	regulation of myeloid leukocyte mediated immunity	2.931e-06	0.01256	0.0002731	0.002442	7	50	GAB2,PRAM1,STXBP2,FES,PLD2,FGR,CXCL2
GO:1901652	response to peptide	3.014e-06	0.01292	0.0002748	0.002457	20	478	ATP6V0B,INPPL1,IRF5,RXRA,ADM,SERPINA1,PTPRE,BSG,NFKBIA,PKM,FOXO4,PLD2,GNG3,RAB13,SOCS3,NR4A2,NR4A3,KLF10,IRS2,CTSB
GO:0007229	integrin-mediated signaling pathway	3.187e-06	0.01366	0.0002845	0.002544	9	95	ADAM15,ITGA5,ITGAM,ITGAX,GAB2,TYROBP,PRAM1,FGR,HCK
GO:0006887	exocytosis	3.299e-06	0.01414	0.0002885	0.00258	19	439	NAPA,GAB2,QSOX1,PRAM1,SERPINA1,STXBP2,FES,CCL3,PLD2,FGR,RAB13,VEGFA,LAT2,NR4A3,THBS1,P2RX1,TNFAIP2,STX11,HCK
GO:0002443	leukocyte mediated immunity	3.484e-06	0.01493	0.0002986	0.00267	17	360	BCL3,LILRB1,VSIR,GAB2,PRAM1,STXBP2,FES,CCL3,PLD2,FGR,LAT2,ICAM1,NR4A3,CXCL2,ARRB2,PIK3R6,STX11
GO:0002520	immune system development	3.997e-06	0.01713	0.0003312	0.002961	30	956	RASGRP4,CEBPB,CEBPD,SPI1,BCL3,ITGAM,LILRB1,GAB2,TYROBP,HIST1H4D,PIM1,NFKBIA,MITF,FES,CCL3,MAFB,TESC,SEMA4A,LILRB4,VEGFA,FOS,LRRK1,DLL1,CXCL2,ZFP36,TFE3,TTC7A,CSF1R,KLF10,PIK3R6
GO:0001775	cell activation	4.019e-06	0.01722	0.0003312	0.002961	31	1007	CDKN1A,CEBPB,SPI1,VSIG4,BCL3,ITGAM,ITGAX,LILRB1,VSIR,GAB2,TYROBP,PRAM1,STXBP2,PTPRE,FES,CCL3,MAFB,PLD2,SEMA4A,FGR,LAT2,ICAM1,NR4A3,DLL1,THBS1,ARRB2,P2RX1,PIK3R6,TNFSF13B,IRS2,STX11
GO:0002279	mast cell activation involved in immune response	4.38e-06	0.01877	0.0003459	0.003093	7	53	GAB2,STXBP2,FES,PLD2,FGR,LAT2,NR4A3
GO:0043303	mast cell degranulation	4.38e-06	0.01877	0.0003459	0.003093	7	53	GAB2,STXBP2,FES,PLD2,FGR,LAT2,NR4A3
GO:0002703	regulation of leukocyte mediated immunity	4.439e-06	0.01903	0.0003459	0.003093	12	186	LILRB1,VSIR,GAB2,PRAM1,STXBP2,FES,PLD2,FGR,ICAM1,CXCL2,ARRB2,PIK3R6
GO:0002521	leukocyte differentiation	4.584e-06	0.01965	0.0003509	0.003137	21	535	CEBPB,SPI1,BCL3,ITGAM,LILRB1,GAB2,TYROBP,MITF,CCL3,MAFB,TESC,SEMA4A,LILRB4,VEGFA,FOS,LRRK1,DLL1,TFE3,CSF1R,KLF10,PIK3R6
GO:0007167	enzyme linked receptor protein signaling pathway	5.313e-06	0.02277	0.0003995	0.003572	31	1021	RASGRP4,ATP6V0B,SPRED2,INPPL1,ITGA5,PTGIR,VSIR,GAB2,BMP3,CYFIP1,PTPRE,AP2A1,FES,FOXO4,PLAUR,FKBP8,FGR,VEGFA,HBEGF,FOS,SOCS3,DLL1,THBS1,UBE2O,ARRB2,CSF1R,IGFBP4,KLF10,FURIN,IRS2,HCK
GO:0002448	mast cell mediated immunity	5.644e-06	0.02419	0.0004171	0.003729	7	55	GAB2,STXBP2,FES,PLD2,FGR,LAT2,NR4A3
GO:0030100	regulation of endocytosis	6.248e-06	0.02678	0.0004539	0.004058	13	226	HIP1,SIGLEC9,LILRB1,PLD2,FGR,VEGFA,SNX33,DLL1,ARRB2,CD14,PPT1,HCK,PACSIN2
GO:0002697	regulation of immune effector process	8.76e-06	0.03754	0.0006257	0.005594	19	470	CFP,LILRB1,VSIR,GAB2,PRAM1,STXBP2,AP2A1,HIST1H3E,FES,C5AR1,PLD2,FGR,ICAM1,NR4A3,APOA2,CXCL2,ARRB2,PIK3R6,HCK
